# Supplementary material for: Genome-Wide Study of Conidiation-Related Genes in the Aphid-Obligate Fungal Pathogen Conidiobolus obscurus (Entomophthoromycotina)
Source: MDPI journal article supplement (doi:10.3390/jof8040389), 2022-04-12

**Table S1 The designed primers for qPCR**

| Internal ID/gene | Primer Sequence      |                        |
|------------------|----------------------|------------------------|
|                  | Forward              | Reverse                |
| mRNAs            |                      |                        |
| EVM0003971       | cGAATATGAGCCTGGAGAT  | CGACCTTAGAATCCTTGT     |
| EVM0004814       | GATTCTTCGCCGTTCAAG   | ACATAAGGGTCTGGTATTCC   |
| EVM0009373       | CTCATTGCTGGTGTGTAT   | GTATTACGGTCAAGGATAGAAC |
| EVM0008905       | GACGGACAAGTATGTAATGG | AATGGAAGGAAGTTGAACAG   |
| EF1              | CGATACCTCCCTCCGCCAG  | ACAGGCGGAACGACCACAAC   |

**Table S2 Repeative sequence statistic of *Conidiobolus obscurus***

| Type                | Number | Length (bp) | Percentage (%) |
|---------------------|--------|-------------|----------------|
| Class I             | 20,908 | 4,509,867   | 11.99          |
| Class I/LINE        | 26     | 1,523       | 0.00           |
| Class I/LTR         | 2      | 171         | 0.00           |
| Class I/LTR/Copia   | 18     | 1,760       | 0.00           |
| Class I/LTR/Gypsy   | 152    | 304,211     | 0.81           |
| Class I/PLE/LARD    | 20,710 | 4,225,460   | 11.24          |
| Class II            | 5,304  | 968,376     | 2.57           |
| Class II/MITE       | 3,362  | 476,389     | 1.27           |
| Class II/Maverick   | 1,527  | 295,252     | 0.79           |
| Class II/TIR        | 193    | 129,689     | 0.34           |
| Class II/Unknown    | 222    | 93,467      | 0.25           |
| Potential Host Gene | 1,351  | 259,385     | 0.69           |
| SSR                 | 25     | 10,926      | 0.03           |
| Unknown             | 9,816  | 2,088,534   | 5.55           |
| Total               | 27,588 | 6,558,671   | 17.44          |

**Table S3 Gene number of the protein-encoding genes annotated in different databases**

| Database  | Number |
|-----------|--------|
| GO        | 2,375  |
| KEGG      | 4,321  |
| KOG       | 6,465  |
| Pfam      | 7,710  |
| Swissprot | 6,460  |
| TrEMBL    | 8,195  |
| Nr        | 8,270  |
| CAZyme    | 392    |
| TCDB      | 97     |
| PHI       | 2,888  |
| all       | 8,566  |

**Table S4 the sequencing data and alignment statistics**

| <b>Samples</b> | <b>Clean reads</b> | <b>Clean bases</b> | <b>GC Content*</b> | <b>%≥Q30<sup>Ψ</sup></b> | <b>Mapped reads</b>    |
|----------------|--------------------|--------------------|--------------------|--------------------------|------------------------|
| C-1            | 56,539,926         | 16,803,169,322     | 37.10%             | 94.29%                   | 81,354,935<br>(71.94%) |
| C-2            | 58,566,590         | 17,455,882,080     | 37.23%             | 94.56%                   | 85,057,246<br>(72.62%) |
| C-3            | 60,759,696         | 18,028,324,124     | 37.37%             | 94.66%                   | 75,783,626<br>(62.36%) |
| Pre-C-1        | 21,365,220         | 6,395,062,008      | 37.54%             | 94.11%                   | 35,882,293<br>(83.97%) |
| Pre-C-2        | 20,596,396         | 6,165,534,548      | 37.57%             | 94.24%                   | 34,729,506<br>(84.31%) |
| Pre-C-3        | 21,521,034         | 6,447,217,940      | 37.37%             | 93.94%                   | 36,143,008<br>(83.79%) |
| Post-C-1       | 22,055,956         | 6,606,661,946      | 36.81%             | 94.13%                   | 36,498,667<br>(82.74%) |
| Post-C-2       | 20,455,959         | 6,128,162,266      | 36.45%             | 93.73%                   | 33,753,277<br>(82.5%)  |
| Post-C-3       | 22,409,737         | 6,710,299,490      | 36.78%             | 94.48%                   | 37,116,052<br>(82.81%) |

\* GC content: GC content percentage of Clean Data, namely the percentage of Clean Data base G and C;

<sup>Ψ</sup> %≥Q30: percentage of Clean Data which quality value is greater than or equal to Q30 (an error rate of 1 in 1000).

**Table S5 Differential expression of selected genes putatively related to transcription factors (TF) during conidiation.**

| Internal ID | FPKM* |        |        | Log2(FC) <sup>†</sup> |              | PHI      | Annotation                         |
|-------------|-------|--------|--------|-----------------------|--------------|----------|------------------------------------|
|             | Pre-C | C      | Post-C | C vs. pre-C           | C vs. post-C |          |                                    |
| EVM0007139  | 0.25  | 5.57   | 2.88   | 3.89                  | 1.21         | PHI:287  | GATA-4/5/6 TF                      |
| EVM0007072  | 16.24 | 41.74  | 23.84  | 1.39                  | 1.07         | /        | Histone-like TF                    |
| EVM0006849  | 44.03 | 101.27 | 57.09  | 1.23                  | 1.09         | /        | Transcription initiation factor    |
| Co_242      | 0.00  | 18.18  | 2.89   | 7.70                  | 2.82         | /        | TFIIA                              |
| EVM0006123  | 0.92  | 4.69   | 0.97   | 2.33                  | 2.35         | PHI:2128 | Homeobox phx1 TF                   |
| EVM0003245  | 0.00  | 2.34   | 0.13   | 6.15                  | 3.79         | PHI:2039 | Homeobox phx1 TF                   |
| EVM0001087  | 1.34  | 5.91   | 1.52   | 2.09                  | 2.12         | PHI:2039 | C2H2 finger domain TF              |
| EVM0004983  | 0.06  | 2.99   | 0.31   | 4.95                  | 3.40         | PHI:232  | C2H2 finger domain TF              |
| EVM0008462  | 1.93  | 18.15  | 5.54   | 3.19                  | 1.90         | PHI:1405 | STE-like TF                        |
| EVM0002148  | 0.11  | 2.13   | 0.24   | 3.90                  | 3.18         | PHI:3315 | SteA TF                            |
| EVM0007454  | 0.33  | 3.78   | 0.19   | 3.44                  | 4.45         | PHI:1921 | Activator of gluconeogenesis TF    |
| EVM0000062  | 12.39 | 25.68  | 11.54  | 1.09                  | 1.43         | PHI:2930 | RNA polymerase II-specific TF      |
| EVM0010146  | 0.13  | 1.47   | 0.32   | 3.10                  | 2.23         |          | Cutinase TF                        |
| EVM0000205  | 18.17 | 41.06  | 15.94  | 1.22                  | 1.63         | PHI:1742 | Fungal specific TF                 |
| EVM0003677  | 9.24  | 111.30 | 38.21  | 3.56                  | 1.80         | PHI:2565 | Fungal specific TF                 |
| EVM0008905  | 38.21 | 269.52 | 11.23  | 2.83                  | 4.76         | PHI:2406 | Heat shock TF                      |
| Co_1230     | 1.00  | 4.90   | 0.65   | 2.16                  | 2.96         | /        | Heat shock TF                      |
| EVM0008509  | 28.60 | 61.05  | 19.28  | 1.13                  | 1.93         | /        | Pcc1 TF                            |
| EVM0006858  | 21.95 | 71.91  | 36.99  | 1.74                  | 1.22         | /        | e(y)2 TF                           |
| EVM0002806  | 13.05 | 34.55  | 11.79  | 1.44                  | 1.82         | PHI:1295 | Transcription initiation factor    |
| EVM0000750  | 98.92 | 204.70 | 46.81  | 1.10                  | 2.36         | PHI:3808 | TFIID                              |
|             |       |        |        |                       |              |          | Asexual reproduction regulation TF |
|             |       |        |        |                       |              |          | CREB family TF                     |

\* The transcript level is expressed as fragments per kilobase per million mapped reads (FPKM).

† FC is the fold change (FC) of DEGs based on a FC of  $\geq 2$  and an FDR of  $< 0.01$ .

**Table S6 The DEGs associated with the main GO terms**

| Internal ID                                                    | FPKM* |        |        | Log2(FC) <sup>†</sup> |              | Pfam annotation                       |
|----------------------------------------------------------------|-------|--------|--------|-----------------------|--------------|---------------------------------------|
|                                                                | Pre-C | C      | Post-C | C vs. pre-C           | C vs. post-C |                                       |
| Biological Process:carbohydrate metabolic process (GO:0005975) |       |        |        |                       |              |                                       |
| EVM0003314                                                     | 0.30  | 21.02  | 0.00   | 5.88                  | 9.51         | Glycosyl hydrolases family 16         |
| EVM0005673                                                     | 0.77  | 2.40   | 0.06   | 1.62                  | 5.33         | Glycosyl hydrolases family 31         |
| EVM0009297                                                     | 25.90 | 59.04  | 16.88  | 1.23                  | 2.07         | Glycogen debranching enzyme           |
| EVM0009626                                                     | 31.33 | 65.56  | 20.27  | 1.11                  | 1.96         | Glycogen debranching enzyme           |
| EVM0000365                                                     | 10.12 | 47.79  | 0.87   | 2.27                  | 5.99         | Glycosyl hydrolases family 16         |
| EVM0001373                                                     | 10.45 | 48.78  | 0.90   | 2.25                  | 5.97         | Glycosyl hydrolases family 16         |
| EVM0008569                                                     | 22.33 | 49.64  | 27.33  | 1.18                  | 1.12         | Ribulose-phosphate 3 epimerase family |
| EVM0007041                                                     | 76.64 | 161.17 | 57.15  | 1.11                  | 1.76         | Ribulose-phosphate 3 epimerase family |
| EVM0008158                                                     | 0.00  | 1.55   | 0.07   | 6.09                  | 4.10         | Glycosyl hydrolases family 18         |
| EVM0004064                                                     | 3.64  | 133.52 | 22.28  | 5.14                  | 2.81         | Glycosyl hydrolases family 18         |
| EVM0001249                                                     | 6.24  | 148.22 | 24.14  | 4.48                  | 2.84         | Glycosyl hydrolases family 18         |
| EVM0004020                                                     | 1.58  | 206.41 | 17.19  | 6.98                  | 3.82         | Glycosyl hydrolases family 18         |
| EVM0004131                                                     | 8.18  | 131.74 | 23.17  | 3.99                  | 2.74         | Glycosyl hydrolases family 18         |
| Biological Process: transport (GO:0006810)                     |       |        |        |                       |              |                                       |
| EVM0004058                                                     | 5.71  | 11.80  | 5.54   | 1.08                  | 1.36         | ABC transporter                       |
| EVM0002255                                                     | 0.02  | 3.49   | 0.42   | 5.89                  | 2.85         | Major intrinsic protein               |
| EVM0006467                                                     | 0.04  | 5.42   | 0.12   | 4.52                  | 5.47         | Sugar (and other) transporter         |
| EVM0007330                                                     | 2.86  | 54.35  | 4.28   | 4.26                  | 3.92         | Sulfate permease family; STAS domain  |
| EVM0006243                                                     | 1.22  | 10.98  | 1.37   | 3.14                  | 3.23         | Sulfate permease family               |
| EVM0009518                                                     | 12.87 | 35.39  | 12.83  | 1.47                  | 1.68         | Sulfate permease family               |
| EVM0009164                                                     | 7.66  | 21.62  | 12.07  | 1.53                  | 1.10         | STAS domain                           |
| EVM0002273                                                     | 4.98  | 55.02  | 17.55  | 3.46                  | 1.92         | Sodium/hydrogen                       |

|                                                   |        |        |        |      |      |                                                                   |
|---------------------------------------------------|--------|--------|--------|------|------|-------------------------------------------------------------------|
| EVM0004950                                        | 23.24  | 65.43  | 33.45  | 1.53 | 1.24 | exchanger family                                                  |
| EVM0003315                                        | 7.42   | 16.96  | 6.98   | 1.18 | 1.50 | Mitochondrial carrier                                             |
| EVM0000187                                        | 9.02   | 20.94  | 8.40   | 1.26 | 1.59 | Mitochondrial carrier                                             |
| EVM0003819                                        | 10.66  | 20.92  | 11.24  | 1.01 | 1.17 | ABC transporter                                                   |
| Biological Process: cellular process (GO:0009987) |        |        |        |      |      | Nucleoside transporter                                            |
| EVM0006180                                        | 0.21   | 7.20   | 1.11   | 4.70 | 2.91 | Glucanosyltransferase; X8 domain                                  |
| EVM0007333                                        | 0.14   | 2.54   | 0.44   | 3.80 | 2.66 | Glucanosyltransferase; X8 domain                                  |
| EVM0004067                                        | 86.45  | 544.69 | 301.14 | 2.67 | 1.12 | Cellulase (glycosyl hydrolase family 5)                           |
| EVM0010061                                        | 3.07   | 6.70   | 1.20   | 1.16 | 2.68 | Protein tyrosine kinase                                           |
| EVM0008877                                        | 8.02   | 16.60  | 3.22   | 1.09 | 2.61 | Protein tyrosine kinase                                           |
| Co_2537                                           | 2.56   | 5.06   | 3.09   | 1.02 | 1.68 | Response regulator receiver domain                                |
| EVM0002403                                        | 3.76   | 20.76  | 10.86  | 2.48 | 1.21 | Lipase (class 3)                                                  |
| EVM0001310                                        | 6.53   | 15.93  | 6.64   | 1.28 | 1.51 | Dolichol phosphate-mannose biosynthesis regulatory protein (DPM2) |
| EVM0006252                                        | 0.00   | 5.03   | 0.97   | 7.84 | 2.50 | Protein tyrosine kinase; Kinase-like                              |
| EVM0004435                                        | 4.02   | 24.39  | 7.19   | 2.61 | 2.02 | Cyclophilin type peptidyl-prolyl cis-trans isomerase/CLD          |
| EVM0003992                                        | 3.91   | 23.47  | 6.92   | 2.59 | 2.02 | Cyclophilin type peptidyl-prolyl cis-trans isomerase/CLD          |
| EVM0003677                                        | 9.24   | 111.30 | 38.21  | 3.56 | 1.80 | HSF-type DNA-binding                                              |
| EVM0002806                                        | 13.05  | 34.55  | 11.79  | 1.44 | 1.82 | Cell pattern formation-associated                                 |
| EVM0003907                                        | 0.03   | 3.64   | 0.03   | 3.66 | 5.64 | Peptidase inhibitor I9                                            |
| EVM0001805                                        | 1.07   | 2.90   | 0.15   | 1.44 | 4.24 | Peptidase inhibitor I9                                            |
| Cellular Component: membrane (GO:0016020)         |        |        |        |      |      |                                                                   |
| EVM0004514                                        | 47.08  | 91.44  | 40.78  | 1.01 | 1.44 | Glucanosyltransferase; X8 domain                                  |
| EVM0002472                                        | 2.21   | 9.34   | 1.72   | 2.11 | 2.71 | 1,3-beta-glucan synthase                                          |
| EVM0003159                                        | 0.75   | 7.38   | 0.34   | 3.23 | 4.44 | --                                                                |
| EVM0000484                                        | 2.27   | 9.24   | 1.73   | 2.06 | 2.68 | 1,3-beta-glucan synthase                                          |
| EVM0004224                                        | 2.86   | 10.57  | 2.08   | 1.93 | 2.61 | 1,3-beta-glucan synthase                                          |
| EVM0001764                                        | 6.32   | 21.13  | 4.13   | 1.78 | 2.62 | 1,3-beta-glucan synthase                                          |
| EVM0005934                                        | 0.01   | 1.64   | 0.06   | 5.13 | 4.43 | Fibronectin type II domain                                        |
| EVM0004067                                        | 86.45  | 544.69 | 301.14 | 2.67 | 1.12 | Cellulase                                                         |
| EVM0010219                                        | 126.01 | 321.21 | 52.74  | 1.38 | 2.87 | Fatty acid hydroxylase                                            |

|                                          |       |        |       |      |      |                                                                  |
|------------------------------------------|-------|--------|-------|------|------|------------------------------------------------------------------|
| EVM0003064                               | 35.03 | 189.63 | 16.33 | 2.47 | 3.80 | superfamily<br>ABC transporter                                   |
| EVM0004058                               | 5.71  | 11.80  | 5.54  | 1.08 | 1.36 | ABC transporter                                                  |
| EVM0000865                               | 0.02  | 1.09   | 0.01  | 5.23 | 6.10 | E1-E2 ATPase                                                     |
| EVM0001785                               | 0.02  | 1.12   | 0.01  | 5.10 | 6.13 | E1-E2 ATPase                                                     |
| EVM0001357                               | 1.69  | 7.84   | 0.42  | 2.22 | 4.40 | E1-E2 ATPase                                                     |
| EVM0005475                               | 23.17 | 766.40 | 1.97  | 5.06 | 8.74 | NADH-ubiquinone<br>reductase complex 1<br>MLRQ subunit           |
| EVM0006467                               | 0.04  | 5.42   | 0.12  | 4.52 | 5.47 | Major Facilitator<br>Superfamily                                 |
| EVM0010232                               | 11.82 | 36.07  | 3.93  | 1.65 | 3.45 | Sugar (and other)<br>transporter                                 |
| EVM0004950                               | 23.24 | 65.43  | 33.45 | 1.53 | 1.24 | Mitochondrial carrier<br>protein                                 |
| EVM0004653                               | 50.58 | 124.17 | 52.37 | 1.28 | 1.47 | Mitochondrial carrier<br>protein                                 |
| EVM0003315                               | 7.42  | 16.96  | 6.98  | 1.18 | 1.50 | Mitochondrial carrier<br>protein                                 |
| EVM0004218                               | 2.40  | 11.34  | 3.28  | 2.17 | 1.98 | Heavy-metal-associated<br>domain                                 |
| EVM0005466                               | 28.92 | 90.54  | 17.56 | 1.69 | 2.64 | EamA-like transporter<br>family                                  |
| EVM0006025                               | 11.59 | 27.57  | 5.91  | 1.29 | 2.49 | EamA-like transporter<br>family                                  |
| EVM0000187                               | 9.02  | 20.94  | 8.40  | 1.26 | 1.59 | ABC transporter                                                  |
| EVM0005299                               | 69.05 | 137.92 | 39.23 | 1.01 | 2.08 | Cytochrome c oxidase<br>subunit VIc                              |
| EVM0002609                               | 3.71  | 22.25  | 7.96  | 2.61 | 1.75 | Glycosyl hydrolase family<br>47                                  |
| EVM0003938                               | 19.16 | 94.08  | 24.69 | 2.30 | 2.17 | NADH-ubiquinone<br>oxidoreductase MWFE<br>subunit                |
| Cellular Component: cytosol (GO:0005829) |       |        |       |      |      |                                                                  |
| EVM0001685                               | 0.23  | 10.18  | 0.19  | 5.06 | 5.52 | Ubiquitin-conjugating<br>enzyme                                  |
| Co_1850                                  | 7.65  | 24.25  | 8.56  | 1.54 | 1.61 | LSM domain                                                       |
| EVM0005642                               | 6.97  | 27.14  | 10.29 | 1.98 | 1.65 | LSM domain                                                       |
| EVM0002852                               | 11.65 | 33.69  | 11.81 | 1.56 | 1.77 | Ubiquitin family                                                 |
| EVM0000395                               | 72.33 | 192.18 | 69.85 | 1.44 | 1.73 | Ubiquitin family                                                 |
| EVM0010225                               | 12.44 | 29.32  | 6.67  | 1.25 | 2.33 | U1 zinc finger                                                   |
| EVM0002141                               | 7.76  | 15.95  | 4.99  | 1.07 | 1.93 | Cytidine and<br>deoxycytidylate deaminase<br>zinc-binding region |

|                                                     |        |         |        |      |      |                                              |
|-----------------------------------------------------|--------|---------|--------|------|------|----------------------------------------------|
| EVM0009693                                          | 2.90   | 18.26   | 3.28   | 2.54 | 2.62 | Uncharacterised protein family               |
| EVM0005733                                          | 887.99 | 2628.51 | 612.76 | 1.60 | 2.36 | Ribosomal L29 protein                        |
| EVM0006554                                          | 50.75  | 259.70  | 60.76  | 2.38 | 2.35 | Thioredoxin; AhpC/TSA family                 |
| EVM0002020                                          | 99.80  | 266.43  | 113.85 | 1.44 | 1.49 | Thioredoxin; AhpC/TSA family                 |
| EVM0002444                                          | 252.14 | 506.80  | 158.18 | 1.03 | 1.94 | Thioredoxin; AhpC/TSA family                 |
| EVM0003561                                          | 89.95  | 228.12  | 117.78 | 1.36 | 1.21 | EF-hand domain                               |
| EVM0004218                                          | 2.40   | 11.34   | 3.28   | 2.17 | 1.98 | Heavy-metal-associated domain                |
| EVM0006741                                          | 4.89   | 11.72   | 5.87   | 1.25 | 1.23 | Urm1 (Ubiquitin related modifier)            |
| EVM0000925                                          | 15.56  | 44.95   | 18.82  | 1.57 | 1.53 | Acyl transferase                             |
| EVM0001674                                          | 12.36  | 34.64   | 13.94  | 1.53 | 1.59 | Acyl transferase                             |
| EVM0001137                                          | 10.84  | 25.60   | 9.36   | 1.26 | 1.72 | Acyl transferase                             |
| Cellular Component: nucleus (GO:0005634)            |        |         |        |      |      |                                              |
| EVM0001685                                          | 0.23   | 10.18   | 0.19   | 5.06 | 5.52 | Ubiquitin-conjugating enzyme                 |
| EVM0002852                                          | 11.65  | 33.69   | 11.81  | 1.56 | 1.77 | Ubiquitin family                             |
| EVM0000395                                          | 72.33  | 192.18  | 69.85  | 1.44 | 1.73 | Ubiquitin family                             |
| EVM0009693                                          | 2.90   | 18.26   | 3.28   | 2.54 | 2.62 | Uncharacterised protein family               |
| EVM0006554                                          | 50.75  | 259.70  | 60.76  | 2.38 | 2.35 | Thioredoxin                                  |
| EVM0002020                                          | 99.80  | 266.43  | 113.85 | 1.44 | 1.49 | Thioredoxin                                  |
| EVM0002444                                          | 252.14 | 506.80  | 158.18 | 1.03 | 1.94 | Thioredoxin                                  |
| EVM0003561                                          | 89.95  | 228.12  | 117.78 | 1.36 | 1.21 | EF-hand domain                               |
| EVM0004218                                          | 2.40   | 11.34   | 3.28   | 2.17 | 1.98 | Heavy-metal-associated domain                |
| EVM0010037                                          | 177.80 | 1749.36 | 115.71 | 3.31 | 4.18 | Acyl CoA binding protein                     |
| EVM0008569                                          | 22.33  | 49.64   | 27.33  | 1.18 | 1.12 | Ribulose-phosphate 3 epimerase               |
| EVM0007041                                          | 76.64  | 161.17  | 57.15  | 1.11 | 1.76 | Ribulose-phosphate 3 epimerase               |
| EVM0004983                                          | 0.06   | 2.99    | 0.31   | 4.95 | 3.40 | STE like transcription factor                |
| EVM0002148                                          | 0.11   | 2.13    | 0.24   | 3.90 | 3.18 | Fungal Zn(2)-Cys(6) binuclear cluster domain |
| Molecular Function: hydrolase activity (GO:0016787) |        |         |        |      |      |                                              |
| EVM0009290                                          | 5.10   | 251.35  | 26.34  | 5.64 | 3.50 | Cellulase                                    |
| EVM0007726                                          | 28.46  | 63.04   | 8.57   | 1.19 | 3.13 | Glycosyl hydrolase family                    |
| EVM0004067                                          | 86.45  | 544.69  | 301.14 | 2.67 | 1.12 | Cellulase)                                   |
| EVM0003971                                          | 42.26  | 105.31  | 50.33  | 1.36 | 1.34 | Beta-glucan synthesis-                       |

|                                                     |       |        |       |      |      |                                               |
|-----------------------------------------------------|-------|--------|-------|------|------|-----------------------------------------------|
|                                                     |       |        |       |      |      | associated protein (SKN1)                     |
| Co_1182                                             | 0.00  | 0.47   | 0.11  | 6.18 | 2.22 | Platelet-activating factor<br>acetylhydrolase |
| EVM0002220                                          | 1.39  | 6.54   | 1.47  | 2.26 | 2.41 | Amidohydrolase family                         |
| EVM0000082                                          | 0.02  | 0.65   | 0.00  | 4.10 | 6.64 | Subtilase family                              |
| EVM0001805                                          | 1.07  | 2.90   | 0.15  | 1.44 | 4.24 | Subtilase family                              |
| EVM0008226                                          | 9.05  | 53.10  | 1.22  | 2.57 | 5.63 | Trypsin                                       |
| EVM0005001                                          | 21.39 | 88.68  | 1.10  | 2.08 | 6.55 | Trypsin                                       |
| EVM0009772                                          | 2.42  | 5.80   | 0.08  | 1.27 | 5.66 | Trypsin                                       |
| EVM0001721                                          | 48.83 | 147.41 | 19.30 | 1.63 | 3.20 | Trypsin                                       |
| EVM0000789                                          | 0.02  | 2.06   | 0.01  | 5.13 | 6.18 | Glycosyl hydrolases family<br>18              |
| EVM0000088                                          | 0.47  | 10.13  | 0.64  | 4.38 | 4.18 | Glycosyl hydrolases family<br>18              |
| EVM0007380                                          | 0.00  | 1.05   | 0.01  | 5.72 | 5.23 | Glycosyl hydrolases family<br>18              |
| EVM0000612                                          | 0.46  | 8.30   | 0.60  | 4.13 | 4.00 | Glycosyl hydrolases family<br>18              |
| EVM0008574                                          | 0.11  | 0.87   | 0.27  | 2.72 | 1.88 | Glycosyl hydrolases family<br>18              |
| EVM0006427                                          | 0.11  | 0.84   | 0.32  | 2.68 | 1.63 | Glycosyl hydrolases family<br>18              |
| EVM0003563                                          | 0.11  | 0.84   | 0.25  | 2.64 | 1.89 | Glycosyl hydrolases family<br>18              |
| Molecular Function: catalytic activity (GO:0003824) |       |        |       |      |      |                                               |
| EVM0006541                                          | 0.06  | 220.04 | 63.88 | 9.69 | 2.04 | Polysaccharide deacetylase                    |
| EVM0008805                                          | 0.00  | 10.70  | 0.00  | 8.66 | 9.19 | Glycosyl hydrolases family<br>16              |
| EVM0008271                                          | 0.00  | 9.93   | 0.00  | 8.44 | 8.98 | Glycosyl hydrolases family<br>16              |
| EVM0004224                                          | 2.86  | 10.57  | 2.08  | 1.93 | 2.61 | 1,3-beta-glucan synthase                      |
| EVM0000444                                          | 0.88  | 28.13  | 1.34  | 5.02 | 4.65 | Chitin synthase                               |
| EVM0006157                                          | 0.01  | 6.72   | 0.74  | 5.96 | 3.32 | Pyridoxal-dependent<br>decarboxylase          |
| EVM0009297                                          | 25.90 | 59.04  | 16.88 | 1.23 | 2.07 | Glycogen debranching<br>enzyme                |
| EVM0009626                                          | 31.33 | 65.56  | 20.27 | 1.11 | 1.96 | Glycogen debranching<br>enzyme                |
| EVM0003949                                          | 0.92  | 6.97   | 2.76  | 2.80 | 1.56 | HD domain                                     |
| EVM0003025                                          | 10.15 | 24.96  | 14.34 | 1.31 | 1.05 | AMP-binding enzyme                            |
| Co_102                                              | 0.03  | 4.79   | 0.04  | 6.32 | 6.31 | Eukaryotic aspartyl<br>protease               |
| EVM0007192                                          | 43.88 | 125.58 | 33.11 | 1.56 | 2.17 | Aminotransferase class I<br>and II            |



|                                                                 |        |        |       |      |      |                                                       |
|-----------------------------------------------------------------|--------|--------|-------|------|------|-------------------------------------------------------|
| EVM0007255                                                      | 6.16   | 17.73  | 7.03  | 1.55 | 1.60 | Glycerophosphoryl diester<br>phosphodiesterase family |
| EVM0004087                                                      | 7.96   | 49.50  | 7.38  | 2.57 | 2.99 | Aminotransferase class I<br>and II                    |
| Molecular Function: serine-type peptidase activity (GO:0008236) |        |        |       |      |      |                                                       |
| EVM0007218                                                      | 0.00   | 6.15   | 0.01  | 7.49 | 7.29 | Subtilase family                                      |
| EVM0000403                                                      | 0.67   | 25.11  | 1.45  | 3.77 | 3.65 | Subtilase family                                      |
| EVM0005632                                                      | 0.41   | 10.97  | 1.22  | 3.70 | 2.98 | Subtilase family                                      |
| EVM0004644                                                      | 147.47 | 970.44 | 12.14 | 2.74 | 6.57 | Subtilase family                                      |
| EVM0008109                                                      | 0.06   | 14.77  | 0.12  | 6.93 | 4.37 | Trypsin                                               |
| EVM0006838                                                      | 4.46   | 290.36 | 7.64  | 5.96 | 5.43 | Trypsin                                               |
| EVM0008156                                                      | 0.47   | 36.30  | 3.51  | 5.95 | 3.56 | Trypsin                                               |
| EVM0007680                                                      | 0.16   | 8.65   | 0.04  | 5.14 | 6.88 | Trypsin                                               |
| EVM0006920                                                      | 10.03  | 255.93 | 10.92 | 4.64 | 4.76 | Trypsin                                               |
| Co_2766                                                         | 2.87   | 42.32  | 0.45  | 3.87 | 6.62 | Trypsin                                               |
| EVM0009083                                                      | 5.02   | 36.42  | 0.99  | 2.87 | 5.41 | Trypsin                                               |
| EVM0003166                                                      | 6.32   | 27.37  | 6.54  | 2.15 | 2.33 | Trypsin                                               |

\* The transcript level is expressed in fragments per kilobase per million fragments (FPKM) values. C: mycelia at sporulating stage; Pre-C: mycelia before sporulating stage; Post-C: mycelia after sporulating stage.

† FC is the fold change of differentially expressed genes between the three libraries of C, Pre-C and PostC. There are genes expressing with significant difference (a fold change  $\geq 2$  and a false discovery rate  $< 0.001$ ).

**Table S7 The DEGs associated with the main KEGG pathway**

| Internal ID                         | FPKM*  |        |        | Log2(FC) †  |              | Pfam annotation                                |
|-------------------------------------|--------|--------|--------|-------------|--------------|------------------------------------------------|
|                                     | Pre-C  | C      | Post-C | C vs. pre-C | C vs. post-C |                                                |
| Oxidative phosphorylation (ko00190) |        |        |        |             |              |                                                |
| EVM0009508                          | 19.49  | 101.99 | 24.80  | 2.40        | 2.30         | ATP synthase subunit H                         |
| EVM0004390                          | 11.36  | 41.00  | 12.96  | 1.86        | 1.91         | Vacuolar (H+)-ATPase G subunit                 |
| EVM0000869                          | 11.09  | 39.75  | 12.80  | 1.85        | 1.88         | Vacuolar (H+)-ATPase G subunit                 |
| EVM0000557                          | 85.43  | 262.37 | 75.67  | 1.65        | 2.05         | Vacuolar (H+)-ATPase G subunit                 |
| EVM0005475                          | 23.17  | 766.40 | 1.97   | 5.06        | 8.74         | NADH-ubiquinone reductase complex 1            |
| EVM0007673                          | 82.11  | 222.07 | 41.72  | 1.45        | 2.65         | NADH-ubiquinone oxidoreductase B18             |
| EVM0004399                          | 40.00  | 104.82 | 37.18  | 1.39        | 1.73         | NADH:ubiquinone oxidoreductase,                |
| EVM0001245                          | 45.65  | 241.07 | 37.97  | 2.42        | 2.92         | Cytochrome oxidase c subunit VIb               |
| EVM0008584                          | 20.72  | 62.39  | 11.85  | 1.61        | 2.64         | Cytochrome c oxidase subunit VIIc              |
| EVM0004161                          | 50.11  | 185.06 | 101.63 | 1.87        | 1.11         | Cytochrome oxidase assembly protein            |
| EVM0006582                          | 254.08 | 559.04 | 183.56 | 1.17        | 1.88         | Cytochrome c oxidase subunit VIa               |
| EVM0005299                          | 69.05  | 137.92 | 39.23  | 1.01        | 2.08         | Cytochrome c oxidase subunit VIc               |
| EVM0008956                          | 8.39   | 39.48  | 8.45   | 2.20        | 2.44         | Ubiquinol-cytochrome C reductase hinge protein |
| EVM0007884                          | 9.44   | 36.04  | 10.39  | 1.93        | 2.04         | Ubiquinol-cytochrome C reductase hinge protein |
| EVM0008409                          | 9.62   | 34.39  | 10.52  | 1.81        | 1.93         | Ubiquinol-cytochrome C reductase hinge protein |
| EVM0002948                          | 16.20  | 66.97  | 14.73  | 2.02        | 2.41         | Ubiquinol-cytochrome C reductase               |
| EVM0003754                          | 11.42  | 47.32  | 10.64  | 1.99        | 2.35         | Ubiquinol-cytochrome C reductase               |
| EVM0009982                          | 11.29  | 26.73  | 13.52  | 1.25        | 1.22         | Ubiquinol-cytochrome-                          |

|                                                              |       |        |       |      |      |                                                                |
|--------------------------------------------------------------|-------|--------|-------|------|------|----------------------------------------------------------------|
|                                                              |       |        |       |      |      | c reductase complex<br>subunit (QCR10)                         |
| EVM0005826                                                   | 37.87 | 139.64 | 36.72 | 1.89 | 2.19 | ATP synthase complex<br>subunit h                              |
| EVM0008514                                                   | 58.16 | 164.13 | 46.60 | 1.52 | 2.07 | ATP synthase complex<br>subunit h                              |
| EVM0000544                                                   | 63.03 | 231.60 | 29.49 | 1.88 | 3.20 | Mitochondrial ATP<br>synthase epsilon chain                    |
| EVM0001330                                                   | 39.78 | 120.09 | 32.18 | 1.61 | 2.15 | Mitochondrial<br>ribosomal protein L51 /<br>S25 / CI-B8 domain |
| EVM0005601                                                   | 42.32 | 109.17 | 29.39 | 1.37 | 2.13 | ATP synthase E chain                                           |
| <b>Amino sugar and nucleotide sugar metabolism (ko00520)</b> |       |        |       |      |      |                                                                |
| EVM0000444                                                   | 0.88  | 28.13  | 1.34  | 5.02 | 4.65 | Chitin synthase                                                |
| EVM0004669                                                   | 3.74  | 36.43  | 11.22 | 3.31 | 1.97 | Chitin synthase                                                |
| EVM0001244                                                   | 48.91 | 588.98 | 30.89 | 3.63 | 4.52 | Glycosyl hydrolase<br>family 20                                |
| EVM0005566                                                   | 74.65 | 342.19 | 19.81 | 2.23 | 4.37 | Glycosyl hydrolase<br>family 20                                |
| EVM0007277                                                   | 20.04 | 42.44  | 11.52 | 1.12 | 2.14 | Acetyltransferase<br>(GNAT) family                             |
| EVM0008158                                                   | 0.00  | 1.55   | 0.07  | 6.09 | 4.10 | Glycosyl hydrolases<br>family 18                               |
| EVM0000789                                                   | 0.02  | 2.06   | 0.01  | 5.13 | 6.18 | Glycosyl hydrolases<br>family 18                               |
| EVM0007628                                                   | 1.09  | 27.49  | 0.76  | 4.65 | 5.38 | Glycosyl hydrolases<br>family 18                               |
| EVM0000088                                                   | 0.47  | 10.13  | 0.64  | 4.38 | 4.18 | Glycosyl hydrolases<br>family 18                               |
| EVM0007380                                                   | 0.00  | 1.05   | 0.01  | 5.72 | 5.23 | Glycosyl hydrolases<br>family 18                               |
| EVM0004064                                                   | 3.64  | 133.52 | 22.28 | 5.14 | 2.81 | Glycosyl hydrolases<br>family 18                               |
| EVM0001249                                                   | 6.24  | 148.22 | 24.14 | 4.48 | 2.84 | Glycosyl hydrolases<br>family 18                               |
| EVM0004020                                                   | 1.58  | 206.41 | 17.19 | 6.98 | 3.82 | Glycosyl hydrolases<br>family 18                               |
| EVM0004131                                                   | 8.18  | 131.74 | 23.17 | 3.99 | 2.74 | Glycosyl hydrolases<br>family 18                               |
| EVM0002377                                                   | 3.67  | 21.22  | 3.63  | 2.56 | 2.81 | Glycosyl hydrolases<br>family 18                               |
| EVM0000612                                                   | 0.46  | 8.30   | 0.60  | 4.13 | 4.00 | Glycosyl hydrolases<br>family 18                               |
| EVM0008574                                                   | 0.11  | 0.87   | 0.27  | 2.72 | 1.88 | Glycosyl hydrolases                                            |

|                                                 |         |         |         |      |      |                                             |
|-------------------------------------------------|---------|---------|---------|------|------|---------------------------------------------|
| EVM0006427                                      | 0.11    | 0.84    | 0.32    | 2.68 | 1.63 | family 18<br>Glycosyl hydrolases            |
| EVM0003563                                      | 0.11    | 0.84    | 0.25    | 2.64 | 1.89 | family 18<br>Glycosyl hydrolases            |
| EVM0005693                                      | 69.41   | 186.04  | 94.25   | 1.45 | 1.25 | family 18<br>GDP-mannose 4,6<br>dehydratase |
| <b>MAPK signaling pathway - yeast (ko04011)</b> |         |         |         |      |      |                                             |
| EVM0008074                                      | 0.21    | 1.79    | 0.08    | 2.84 | 4.10 | 1,3-beta-glucan<br>synthase component       |
| EVM0002472                                      | 2.21    | 9.34    | 1.72    | 2.11 | 2.71 | 1,3-beta-glucan<br>synthase component       |
| EVM0003159                                      | 0.75    | 7.38    | 0.34    | 3.23 | 4.44 | 1,3-beta-glucan<br>synthase component       |
| EVM0007566                                      | 4.93    | 23.19   | 3.05    | 2.26 | 3.18 | 1,3-beta-glucan<br>synthase component       |
| EVM0000484                                      | 2.27    | 9.24    | 1.73    | 2.06 | 2.68 | 1,3-beta-glucan<br>synthase component       |
| EVM0004224                                      | 2.86    | 10.57   | 2.08    | 1.93 | 2.61 | 1,3-beta-glucan<br>synthase component       |
| EVM0001764                                      | 6.32    | 21.13   | 4.13    | 1.78 | 2.62 | 1,3-beta-glucan<br>synthase component       |
| EVM0005361                                      | 18.15   | 309.79  | 148.14  | 4.10 | 1.32 | Catalase-related<br>immune-responsive       |
| EVM0009987                                      | 4.35    | 71.98   | 34.28   | 4.02 | 1.33 | Catalase-related<br>immune-responsive       |
| EVM0007860                                      | 6.31    | 102.14  | 50.99   | 3.99 | 1.26 | Catalase-related<br>immune-responsive       |
| EVM0001653                                      | 22.96   | 61.12   | 33.62   | 1.45 | 1.13 | Variant SH3 domain                          |
| EVM0004983                                      | 0.06    | 2.99    | 0.31    | 4.95 | 3.40 | STE like transcription<br>factor            |
| EVM0001126                                      | 5.85    | 71.98   | 23.78   | 3.62 | 1.86 | GGL domain                                  |
| EVM0008649                                      | 126.30  | 916.02  | 323.30  | 2.89 | 1.77 | GGL domain                                  |
| EVM0000750                                      | 98.92   | 204.70  | 46.81   | 1.10 | 2.36 | bZIP transcription<br>factor                |
| <b>Ribosome (ko03010)</b>                       |         |         |         |      |      |                                             |
| EVM0000242                                      | 815.77  | 2264.82 | 654.09  | 1.51 | 2.06 | S25 ribosomal protein                       |
| EVM0002937                                      | 950.39  | 3871.05 | 526.06  | 2.05 | 3.14 | Ribosomal protein S28e                      |
| EVM0005588                                      | 1245.76 | 3090.38 | 851.98  | 1.34 | 2.13 | Ribosomal protein S27                       |
| EVM0009766                                      | 3.72    | 12.37   | 5.28    | 1.69 | 1.46 | Ribosomal protein L36                       |
| EVM0009938                                      | 4.64    | 13.08   | 6.88    | 1.46 | 1.16 | Ribosomal protein L34                       |
| EVM0003011                                      | 1717.35 | 7151.17 | 1263.06 | 2.09 | 2.77 | Ribosomal protein L44                       |
| Co_61                                           | 110.67  | 363.52  | 56.75   | 1.74 | 2.93 | Ribosomal L38e protein<br>family            |

|            |         |         |         |      |      |                               |
|------------|---------|---------|---------|------|------|-------------------------------|
| EVM0005733 | 887.99  | 2628.51 | 612.76  | 1.60 | 2.36 | Ribosomal L29 protein         |
| Co_2197    | 79.87   | 185.90  | 47.97   | 1.25 | 2.22 | Ribosomal L39 protein         |
| Co_3023    | 210.28  | 485.31  | 155.24  | 1.24 | 1.91 | Ribosomal L38e protein family |
| EVM0008541 | 286.98  | 658.84  | 211.23  | 1.23 | 1.91 | Ribosomal L38e protein family |
| EVM0001436 | 2710.86 | 6189.85 | 1919.84 | 1.23 | 1.96 | Ribosomal protein L32         |
| EVM0007727 | 124.99  | 359.92  | 71.21   | 1.56 | 2.60 | Ribosomal protein S27a        |
| EVM0002763 | 750.10  | 1656.68 | 494.70  | 1.17 | 2.01 | Ribosomal protein S27a        |

\* The transcript level is expressed in fragments per kilobase per million fragments (FPKM) values. C: mycelia at sporulating stage; Pre-C: mycelia before sporulating stage; Post-C: mycelia after sporulating stage.

† FC is the fold change of differentially expressed genes between the three libraries of C, Pre-C and Post-C. There are genes expressing with significant difference (a fold change  $\geq 2$  and a false discovery rate  $< 0.001$ ).

**Table S8 Differential expression of selected genes related to cell wall/membrane/envelope biogenesis during conidiation.**

| Internal ID                               | FPKM*  |        |        | Log2(FC) <sup>†</sup> |              | PHI      |
|-------------------------------------------|--------|--------|--------|-----------------------|--------------|----------|
|                                           | Pre-C  | C      | Post-C | C vs. pre-C           | C vs. post-C |          |
| 1,3-beta-glucan synthase                  |        |        |        |                       |              |          |
| EVM0008074                                | 0.21   | 1.79   | 0.08   | 2.84                  | 4.10         | PHI:2533 |
| EVM0002472                                | 2.21   | 9.34   | 1.72   | 2.11                  | 2.71         | PHI:2533 |
| EVM0003159                                | 0.75   | 7.38   | 0.34   | 3.23                  | 4.44         | PHI:2533 |
| EVM0007566                                | 4.93   | 23.19  | 3.05   | 2.26                  | 3.18         | PHI:2533 |
| EVM0000484                                | 2.27   | 9.24   | 1.73   | 2.06                  | 2.68         | PHI:2533 |
| EVM0004224                                | 2.86   | 10.57  | 2.08   | 1.93                  | 2.61         | PHI:2533 |
| EVM0001764                                | 6.32   | 21.13  | 4.13   | 1.78                  | 2.62         | PHI:2533 |
| EVM0003971                                | 42.26  | 105.31 | 50.33  | 1.36                  | 1.34         | /        |
| Glucanotransferase                        |        |        |        |                       |              |          |
| EVM0006180                                | 0.21   | 7.20   | 1.11   | 4.70                  | 2.91         | PHI:33   |
| EVM0007333                                | 0.14   | 2.54   | 0.44   | 3.80                  | 2.66         | PHI:33   |
| EVM0004514                                | 47.08  | 91.44  | 40.78  | 1.01                  | 1.44         | PHI:33   |
| Glycosyl hydrolase                        |        |        |        |                       |              |          |
| EVM0007001                                | 4.14   | 54.19  | 23.03  | 3.73                  | 1.51         | /        |
| EVM0007042                                | 32.83  | 87.13  | 11.42  | 1.45                  | 3.19         | PHI:748  |
| EVM0007726                                | 28.46  | 63.04  | 8.57   | 1.19                  | 3.13         | PHI:748  |
| EVM0005673                                | 0.77   | 2.40   | 0.06   | 1.62                  | 5.33         | PHI:1071 |
| EVM0003793                                | 0.10   | 1.22   | 0.03   | 3.10                  | 4.73         | /        |
| Chitin synthase/chitinase                 |        |        |        |                       |              |          |
| EVM0000444                                | 0.88   | 28.13  | 1.34   | 5.02                  | 4.65         | PHI:3048 |
| EVM0004669                                | 3.74   | 36.43  | 11.22  | 3.31                  | 1.97         | PHI:3050 |
| EVM0008158                                | 0.00   | 1.55   | 0.07   | 6.09                  | 4.10         | PHI:2388 |
| EVM0000789                                | 0.02   | 2.06   | 0.01   | 5.13                  | 6.18         | PHI:2388 |
| EVM0007628                                | 1.09   | 27.49  | 0.76   | 4.65                  | 5.38         | PHI:2388 |
| EVM0000088                                | 0.47   | 10.13  | 0.64   | 4.38                  | 4.18         | PHI:2388 |
| Cellulase                                 |        |        |        |                       |              |          |
| EVM0009290                                | 5.10   | 251.35 | 26.34  | 5.64                  | 3.50         | PHI:323  |
| EVM0004067                                | 86.45  | 544.69 | 301.14 | 2.67                  | 1.12         | PHI:323  |
| Ergosterol                                |        |        |        |                       |              |          |
| EVM0010219                                | 126.01 | 321.21 | 52.74  | 1.38                  | 2.87         | PHI:3035 |
| Mannan biosynthesis/mannoprotein assembly |        |        |        |                       |              |          |
| EVM0006408                                | 0.47   | 277.15 | 40.64  | 8.94                  | 2.98         | /        |
| EVM0003767                                | 0.95   | 5.10   | 2.14   | 2.35                  | 1.48         | PHI:2482 |

\* The transcript level is expressed as fragments per kilobase per million mapped reads (FPKM).

† FC is the fold change (FC) of DEGs based on a FC of  $\geq 2$  and an FDR of  $< 0.01$ .

**Table S9 The DEGs associated with PHI database\***

| DEG ID     | PHI                                                                                                |
|------------|----------------------------------------------------------------------------------------------------|
| EVM0001654 | PHI:432 FGL1 AAQ23181 5518 Fusarium_graminearum Reduced_virulence                                  |
| EVM0003421 | AKT7 PHI:4194 V5XZS6 5599 Alternaria_alternata increased_virulence_(Hypervirulence)                |
| EVM0006252 | PHI:1221 FGSG_03146 I1RJM9 5518 Gibberella_zeae_(related:_Fusarium_graminearum) Lethal             |
| EVM0004341 | PHI:2117 SPM1 P58371 148305 Magnaporthe_oryzae_(related:_Magnaporthe_grisea) Reduced_virulence     |
| EVM0004394 | AKT7 PHI:4194 V5XZS6 5599 Alternaria_alternata increased_virulence_(Hypervirulence)                |
| EVM0007784 | PHI:432 FGL1 AAQ23181 5518 Fusarium_graminearum Reduced_virulence                                  |
| EVM0007218 | PHI:2117 SPM1 P58371 148305 Magnaporthe_oryzae_(related:_Magnaporthe_grisea) Reduced_virulence     |
| EVM0009119 | PHI:652 GIP1 AAL11720 67593 Phytophthora_sojae Effector_(plant_avirulence_determinant)             |
| EVM0004379 | AKT7 PHI:4194 V5XZS6 5599 Alternaria_alternata increased_virulence_(Hypervirulence)                |
| EVM0004020 | PHI:144 CHT42 AAC05829 29875 Trichoderma_virens Reduced_virulence                                  |
| EVM0008109 | PHI:653 GIP2 AAL11721 67593 Phytophthora_sojae Effector_(plant_avirulence_determinant)             |
| EVM0008303 | PHI:2321 SidI Q4WR83 746128 Aspergillus_fumigatus Reduced_virulence                                |
| EVM0009549 | AKT7 PHI:4194 V5XZS6 5599 Alternaria_alternata increased_virulence_(Hypervirulence)                |
| EVM0002185 | AKT7 PHI:4194 V5XZS6 5599 Alternaria_alternata increased_virulence_(Hypervirulence)                |
| EVM0000830 | PHI:1180 (Sc_Sat4) I1RS32 5518 Gibberella_zeae_(related:_Fusarium_graminearum) Reduced_virulence   |
| EVM0003125 | PHI:2042 ABC3 Q3Y5V5 148305 Magnaporthe_oryzae_(related:_Magnaporthe_grisea) Loss_of_pathogenicity |
| EVM0002496 | PHI:652 GIP1 AAL11720 67593 Phytophthora_sojae Effector_(plant_avirulence_determinant)             |
| EVM0009502 | PHI:438 BcBOT1_(related:_CND5) AAQ16576 40559 Botrytis_cinerea Reduced_virulence                   |
| EVM0004492 | PHI:397 LAC2 AAV64894 5207 Cryptococcus_neoformans Unaffected_pathogenicity                        |
| EVM0008865 | PHI:429 CIPLS1 CAD43407 290576 Colletotrichum_lindemuthianum Loss_of_pathogenicity                 |
| EVM0001751 | PHI:2117 SPM1 P58371 148305 Magnaporthe_oryzae_(related:_Magnaporthe_grisea) Reduced_virulence     |

|            |                                                                                                           |
|------------|-----------------------------------------------------------------------------------------------------------|
| EVM0003245 | PHI:2039 Con7p Q069J4 148305 Magnaporthe_oryzae_(related:_Magnaporthe_grisea) Loss_of_pathogenicity       |
| EVM0008158 | PHI:2388 Chi2 0 5530 Metarhizium_anisopliae Mixed_outcome                                                 |
| EVM0006838 | PHI:652 GIP1 AAL11720 67593 Phytophthora_sojae Effector_(plant_avirulence_determinant)                    |
| EVM0006157 | PHI:177 ODC CAB56523 13684 Stagonospora_nodorum Reduced_virulence                                         |
| EVM0008156 | PHI:652 GIP1 AAL11720 67593 Phytophthora_sojae Effector_(plant_avirulence_determinant)                    |
| EVM0000614 | PHI:697 ugt51E1 AAM81358 5022 Leptosphaeria_maculans Unaffected_pathogenicity                             |
| EVM0001824 | PHI:1161 MgMfs1 A4ZGP3 54734 Mycosphaerella_graminicola_(related:_Zymoseptoria_triticii) Chemistry_target |
| EVM0007380 | PHI:144 CHT42 AAC05829 29875 Trichoderma_virens Reduced_virulence                                         |
| EVM0009290 | PHI:323 VFGLU1 AAO63562 93591 Verticillium_fungicola Reduced_virulence                                    |
| EVM0004016 | PHI:511 CaNAG4 EAK93098 5476 Candida_albicans Reduced_virulence                                           |
| EVM0008454 | PHI:1541 GzF1bD I1RE42 5518 Gibberella_zeae_(related:_Fusarium_graminearum) Unaffected_pathogenicity      |
| EVM0000952 | PHI:777 MGG_00883 EDK02450 318829 Magnaporthe_oryzae Loss_of_pathogenicity                                |
| EVM0002960 | AKT7 PHI:4194 V5XZS6 5599 Alternaria_alternata increased_virulence_(Hypervirulence)                       |
| EVM0007590 | PHI:2021 Pac2 MGG_06564 5270 Ustilago_maydis Reduced_virulence                                            |
| EVM0005882 | Ktr1 PHI:3095 J5JDI1 176275 Beauveria_bassiana unaffected_pathogenicity_                                  |
| EVM0001943 | PHI:577 NoxB BAE72682 35717 Epichloe_festucae Wild-type_mutualism                                         |
| EVM0000865 | PHI:440 PMR1 CAB87245 5476 Candida_albicans Reduced_virulence                                             |
| EVM0007554 | PHI:2117 SPM1 P58371 148305 Magnaporthe_oryzae_(related:_Magnaporthe_grisea) Reduced_virulence            |
| EVM0004064 | PHI:144 CHT42 AAC05829 29875 Trichoderma_virens Reduced_virulence                                         |
| EVM0007680 | PHI:653 GIP2 AAL11721 67593 Phytophthora_sojae Effector_(plant_avirulence_determinant)                    |
| EVM0000789 | PHI:2388 Chi2 0 5530 Metarhizium_anisopliae Mixed_outcome                                                 |
| EVM0001785 | PHI:440 PMR1 CAB87245 5476 Candida_albicans Reduced_virulence                                             |
| EVM0000444 | CSMA PHI:3048 Q4X0H6 746128 Aspergillus_fumigatus mixed_outcome_                                          |
| EVM0004983 | PHI:232 STE12a AAG49739 5207 Cryptococcus_neoformans Reduced_virulence                                    |



|            |                                                                                                         |
|------------|---------------------------------------------------------------------------------------------------------|
| EVM0005502 | PHI:1511 GzHOME009 I1RXF3 5518 Gibberella_zeae_(related:_Fusarium_graminearum) Reduced_virulence        |
| EVM0007786 | PHI:1221 FGSG_03146 I1RJM9 5518 Gibberella_zeae_(related:_Fusarium_graminearum) Lethal                  |
| EVM0003715 | PHI:2357 CYP52X1 E2EAF6 475271 Beauveria_bassiana Reduced_virulence                                     |
| EVM0009373 | PHI:652 GIP1 AAL11720 67593 Phytophthora_sojae Effector_(plant_avirulence_determinant)                  |
| EVM0006180 | PHI:33 PHR1 AAA68196 5476 Candida_albicans Reduced_virulence                                            |
| EVM0007628 | PHI:2388 Chi2 0 5530 Metarhizium_anisopliae Mixed_outcome                                               |
| EVM0006920 | PHI:653 GIP2 AAL11721 67593 Phytophthora_sojae Effector_(plant_avirulence_determinant)                  |
| EVM0006467 | PHI:2968 Hxs1 J9VQA5 5207 Cryptococcus_neoformans Reduced_virulence                                     |
| EVM0001249 | PHI:144 CHT42 AAC05829 29875 Trichoderma_virens Reduced_virulence                                       |
| EVM0001327 | AKT7 PHI:4194 V5XZS6 5599 Alternaria_alternata increased_virulence_(Hypervirulence)                     |
| EVM0004130 | PHI:1434 GzC2H103 I1S8Y5 5518 Gibberella_zeae_(related:_Fusarium_graminearum) Unaffected_pathogenicity  |
| EVM0000088 | PHI:2388 Chi2 0 5530 Metarhizium_anisopliae Mixed_outcome                                               |
| EVM0008112 | PHI:2839 RED1 Q8NJQ2 5016 Cochliobolus_heterostrophus Reduced_virulence                                 |
| EVM0000612 | PHI:144 CHT42 AAC05829 29875 Trichoderma_virens Reduced_virulence                                       |
| EVM0003018 | PHI:2839 RED1 Q8NJQ2 5016 Cochliobolus_heterostrophus Reduced_virulence                                 |
| EVM0005361 | PHI:106 CAT1 AAC39448 5476 Candida_albicans Reduced_virulence                                           |
| EVM0007723 | PHI:104 CaMNT1 CAA67930 5476 Candida_albicans Reduced_virulence                                         |
| EVM0009987 | PHI:106 CAT1 AAC39448 5476 Candida_albicans Reduced_virulence                                           |
| EVM0004131 | PHI:144 CHT42 AAC05829 29875 Trichoderma_virens Reduced_virulence                                       |
| EVM0007860 | PHI:106 CAT1 AAC39448 5476 Candida_albicans Reduced_virulence                                           |
| EVM0001410 | PHI:1310 GzbHLH011 I1RQC1 5518 Gibberella_zeae_(related:_Fusarium_graminearum) Unaffected_pathogenicity |
| EVM0010093 | PHI:432 FGL1 AAQ23181 5518 Fusarium_graminearum Reduced_virulence                                       |
| EVM0002148 | conx1 PHI:3315 G4MT41 318829 Magnaporthe_oryzae reduced_virulence                                       |
| EVM0007672 | PHI:2839 RED1 Q8NJQ2 5016 Cochliobolus_heterostrophus Reduced_virulence                                 |

|            |                                                                                                           |
|------------|-----------------------------------------------------------------------------------------------------------|
| EVM0007139 | PHI:287 CLNR1 AAN65464 290576 Colletotrichum_lindemuthianum Loss_of_pathogenicity                         |
| EVM0007333 | PHI:33 PHR1 AAA68196 5476 Candida_albicans Reduced_virulence                                              |
| EVM0000403 | PHI:2117 SPM1 P58371 148305 Magnaporthe_oryzae_(related:_Magnaporthe_grisea) Reduced_virulence            |
| EVM0007619 | PHI:2117 SPM1 P58371 148305 Magnaporthe_oryzae_(related:_Magnaporthe_grisea) Reduced_virulence            |
| EVM0005600 | PHI:2920 FET3-1 E3QRA4 31870 Colletotrichum_graminicola Reduced_virulence                                 |
| EVM0004577 | PHI:383 SOD5 EAL00626 5476 Candida_albicans Loss_of_pathogenicity                                         |
| EVM0005632 | PHI:2117 SPM1 P58371 148305 Magnaporthe_oryzae_(related:_Magnaporthe_grisea) Reduced_virulence            |
| EVM0006099 | PHI:213 CPA1 AAF69795 5207 Cryptococcus_neoformans Reduced_virulence                                      |
| EVM0003907 | PHI:2117 SPM1 P58371 148305 Magnaporthe_oryzae_(related:_Magnaporthe_grisea) Reduced_virulence            |
| EVM0001001 | PHI:652 GIP1 AAL11720 67593 Phytophthora_sojae Effector_(plant_avirulence_determinant)                    |
| EVM0003677 | PHI:2565 Q5APJ0 Q5APJ0 5476 Candida_albicans Reduced_virulence                                            |
| EVM0003126 | PHI:1161 MgMfs1 A4ZGP3 54734 Mycosphaerella_graminicola_(related:_Zymoseptoria_triticii) Chemistry_target |
| EVM0009891 | PHI:674 Can2 AAZ30051 178876 Cryptococcus_neoformans Increased_virulence_(Hypervirulence)                 |
| EVM0001772 | PHI:2839 RED1 Q8NJQ2 5016 Cochliobolus_heterostrophus Reduced_virulence                                   |
| EVM0009087 | PHI:2128 MoHox1 MGG_04853 148305 Magnaporthe_oryzae_(related:_Magnaporthe_grisea) reduced_virulence       |
| EVM0006347 | PHI:2844 BRM2 O93802 5599 Alternaria_alternata Unaffected_pathogenicity                                   |
| EVM0005592 | AKT7 PHI:4194 V5XZS6 5599 Alternaria_alternata increased_virulence_(Hypervirulence)                       |
| EVM0002733 | PHI:2844 BRM2 O93802 5599 Alternaria_alternata Unaffected_pathogenicity                                   |
| EVM0000479 | PHI:419 CSH1 AAP93915 5476 Candida_albicans Reduced_virulence                                             |
| EVM0007454 | PHI:1921 GzZC236 I1RCH8 5518 Gibberella_zeae_(related:_Fusarium_graminearum) Reduced_virulence            |
| EVM0002401 | PHI:2100 Spf1 MGG_12005 148305 Magnaporthe_oryzae_(related:_Magnaporthe_grisea) Mixed_outcome             |
| EVM0001521 | PHI:1511 GzHOME009 I1RFX3 5518 Gibberella_zeae_(related:_Fusarium_graminearum) Reduced_virulence          |
| EVM0004669 | CHSF PHI:3050 Q4WC58 746128 Aspergillus_fumigatus mixed_outcome                                           |

|            |                                                                                                             |
|------------|-------------------------------------------------------------------------------------------------------------|
| EVM0004891 | PHI:432 FGL1 AAQ23181 5518 Fusarium_graminearum Reduced_virulence                                           |
| EVM0003159 | PHI:2533 FKS1 Q4WLT4 746128 Aspergillus_fumigatus Lethal                                                    |
| EVM0008462 | PHI:1405 GzC2H069 I1RWW2 5518 Gibberella_zeae_(related:_Fusarium_graminearum) Unaffected_pathogenicity      |
| EVM0001555 | PHI:881 MGG_04556 EDJ96020 318829 Magnaporthe_oryzae Reduced_virulence                                      |
| EVM0003299 | PHI:578 NoxR BAF36501 35717 Epichloe_festucae Enhanced_antagonism                                           |
| EVM0004556 | PHI:2266 Ptr2 0 13684 Phaeosphaeria_nodorum_(related:_Stagonospora_nodorum) Unaffected_pathogenicity        |
| EVM0008074 | PHI:2533 FKS1 Q4WLT4 746128 Aspergillus_fumigatus Lethal                                                    |
| EVM0004814 | PHI:2534 ERG11A Q4WNT5 746128 Aspergillus_fumigatus Mixed_outcome                                           |
| EVM0008905 | PHI:2406 MoSKN7 G4N7Y2 148305 Magnaporthe_oryzae_(related:_Magnaporthe_grisea) Unaffected_pathogenicity     |
| EVM0006845 | PHI:2086 Moatg24 MGG_03638 148305 Magnaporthe_oryzae_(related:_Magnaporthe_grisea) Unaffected_pathogenicity |
| EVM0003041 | PHI:2158 MoCMK1 EU_984498 148305 Magnaporthe_oryzae_(related:_Magnaporthe_grisea) Reduced_virulence         |
| EVM0010231 | PHI:511 CaNAG4 EAK93098 5476 Candida_albicans Reduced_virulence                                             |
| EVM0004644 | PHI:2117 SPM1 P58371 148305 Magnaporthe_oryzae_(related:_Magnaporthe_grisea) Reduced_virulence              |
| EVM0003276 | PHI:2042 ABC3 Q3Y5V5 148305 Magnaporthe_oryzae_(related:_Magnaporthe_grisea) Loss_of_pathogenicity          |
| EVM0004948 | PHI:2293 cycA B0XTA5 746128 Aspergillus_fumigatus Reduced_virulence                                         |
| EVM0008574 | PHI:144 CHT42 AAC05829 29875 Trichoderma_virens Reduced_virulence                                           |
| EVM0005176 | PHI:2293 cycA B0XTA5 746128 Aspergillus_fumigatus Reduced_virulence                                         |
| EVM0002621 | PHI:881 MGG_04556 EDJ96020 318829 Magnaporthe_oryzae Reduced_virulence                                      |
| EVM0006427 | PHI:144 CHT42 AAC05829 29875 Trichoderma_virens Reduced_virulence                                           |
| EVM0004067 | PHI:323 VFGLU1 AAO63562 93591 Verticillium_fungicola Reduced_virulence                                      |
| EVM0003563 | PHI:144 CHT42 AAC05829 29875 Trichoderma_virens Reduced_virulence                                           |
| EVM0001189 | PHI:267 MLT1 AAD51594 5476 Candida_albicans Reduced_virulence                                               |
| EVM0003856 | PHI:1564 GzOB004 Q4IPZ1 5518 Gibberella_zeae_(related:_Fusarium_graminearum) Unaffected_pathogenicity       |

|            |                                                                                                          |
|------------|----------------------------------------------------------------------------------------------------------|
| EVM0004435 | PHI:249 CYP1 AAG13968 318829 Magnaporthe_oryzae Reduced_virulence                                        |
| EVM0002609 | PHI:2488 Man1 G4ND25 148305 Magnaporthe_oryzae_(related:_Magnaporthe_grisea) Unaffected_pathogenicity    |
| EVM0003992 | PHI:249 CYP1 AAG13968 318829 Magnaporthe_oryzae Reduced_virulence                                        |
| EVM0008226 | PHI:653 GIP2 AAL11721 67593 Phytophthora_sojae Effector_(plant_avirulence_determinant)                   |
| EVM0006512 | C14DM PHI:3258 Q4QGX0 5664 Leishmania_major reduced_virulence_                                           |
| EVM0002377 | PHI:144 CHT42 AAC05829 29875 Trichoderma_virens Reduced_virulence                                        |
| EVM0000213 | PHI:1506 GzHOME001 I1RC01 5518 Gibberella_zeae_(related:_Fusarium_graminearum) Unaffected_pathogenicity  |
| EVM0002403 | PHI:2081 Moatg15 MGG_12828 148305 Magnaporthe_oryzae_(related:_Magnaporthe_grisea) Loss_of_pathogenicity |
| EVM0003064 | PHI:267 MLT1 AAD51594 5476 Candida_albicans Reduced_virulence                                            |
| EVM0008611 | PHI:397 LAC2 AAV64894 5207 Cryptococcus_neoformans Unaffected_pathogenicity                              |
| EVM0000693 | GGT PHI:3146 O25743 210 Helicobacter_pylori unaffected_pathogenicity_                                    |
| EVM0008849 | PHI:2117 SPM1 P58371 148305 Magnaporthe_oryzae_(related:_Magnaporthe_grisea) Reduced_virulence           |
| EVM0001903 | PHI:432 FGL1 AAQ23181 5518 Fusarium_graminearum Reduced_virulence                                        |
| EVM0006554 | PHI:2644 thioredoxin_1 P0AA28 90371 Salmonella_enterica_serovar_Typhimurium Reduced_virulence            |
| EVM0001722 | PHI:432 FGL1 AAQ23181 5518 Fusarium_graminearum Reduced_virulence                                        |
| EVM0003767 | PHI:2482 AIHK1 Q09JB7 160389 Alternaria_longipes Increased_virulence_(Hypervirulence)                    |
| EVM0006123 | PHI:2128 MoHox1 MGG_04853 148305 Magnaporthe_oryzae_(related:_Magnaporthe_grisea) reduced_virulence      |
| EVM0007566 | PHI:2533 FKS1 Q4WLT4 746128 Aspergillus_fumigatus Lethal                                                 |
| EVM0002356 | PHI:1494 MAT1-1-3 I1RX41 5518 Gibberella_zeae_(related:_Fusarium_graminearum) Unaffected_pathogenicity   |
| EVM0003636 | PHI:811 MGG_10510 EDK06580 318829 Magnaporthe_oryzae Reduced_virulence                                   |
| EVM0008542 | PHI:2545 TIF35 Q4X1I3 746128 Aspergillus_fumigatus Mixed_outcome                                         |
| EVM0001357 | PHI:440 PMR1 CAB87245 5476 Candida_albicans Reduced_virulence                                            |
| EVM0003013 | PHI:2128 MoHox1 MGG_04853 148305 Magnaporthe_oryzae_(related:_Magnaporthe_grisea) reduced_virulence      |

|            |                                                                                                             |
|------------|-------------------------------------------------------------------------------------------------------------|
| EVM0008015 | PHI:1161 MgMfs1 A4ZGP3 54734 Mycosphaerella_graminicola_(related : _Zymoseptoria_triticii) Chemistry_target |
| EVM0009816 | PHI:2510 msdS/AfmsdC Q6PWQ1 746128 Aspergillus_fumigatus Unaffected_pathogenicity                           |
| EVM0003166 | PHI:652 GIP1 AAL11720 67593 Phytophthora_sojae Effector_(plant_avirulence_determinant)                      |
| EVM0009054 | ssp PHI:3418 Q5DPX0 29385 Staphylococcus_saprophyticus mixed_outcome_                                       |
| EVM0003445 | PHI:1052 PHL1 ACB38886 135779 Cercospora_zeae-maydis Unaffected_pathogenicity                               |
| EVM0002682 | PHI:2400 Fgp2 IIS215 5518 Gibberella_zeae_(related: _Fusarium_graminearum) Unaffected_pathogenicity         |
| EVM0002472 | PHI:2533 FKS1 Q4WLT4 746128 Aspergillus_fumigatus Lethal                                                    |
| EVM0001087 | PHI:2039 Con7p Q069J4 148305 Magnaporthe_oryzae_(related: _Magnaporthe_grisea) Loss_of_pathogenicity        |
| EVM0005001 | Vsp PHI:3018 B7VSJ8 212663 Vibrio_splendidus reduced_virulence_                                             |
| EVM0000484 | PHI:2533 FKS1 Q4WLT4 746128 Aspergillus_fumigatus Lethal                                                    |
| EVM0007607 | PHI:1816 GzZC131 I1RRS3 5518 Gibberella_zeae_(related: _Fusarium_graminearum) Unaffected_pathogenicity      |
| EVM0006745 | PHI:2272 CpkB A9Z1V6 13684 Phaeosphaeria_nodorum_(related: _Stagonospora_nodorum) Unaffected_pathogenicity  |
| EVM0004713 | Pop1 PHI:3209 A4KTQ9 312341 Ceratocystis_populicola reduced_virulence_                                      |
| EVM0002111 | PHI:816 MGG_04582 EDJ95999 318829 Magnaporthe_oryzae Reduced_virulence                                      |
| EVM0008189 | PHI:811 MGG_10510 EDK06580 318829 Magnaporthe_oryzae Reduced_virulence                                      |
| EVM0004224 | PHI:2533 FKS1 Q4WLT4 746128 Aspergillus_fumigatus Lethal                                                    |
| EVM0007154 | PHI:1301 GzbHLH002 I1RB45 5518 Gibberella_zeae_(related: _Fusarium_graminearum) Unaffected_pathogenicity    |
| EVM0004161 | PHI:503 COX15 AAB64668 4932 Saccharomyces_cerevisiae Reduced_virulence                                      |
| EVM0002963 | PHI:1301 GzbHLH002 I1RB45 5518 Gibberella_zeae_(related: _Fusarium_graminearum) Unaffected_pathogenicity    |
| EVM0001554 | PHI:438 BcBOT1_(related: _CND5) AAQ16576 40559 Botrytis_cinerea Reduced_virulence                           |
| EVM0009437 | PHI:1343 GzC2H003 I1RAF0 5518 Gibberella_zeae_(related: _Fusarium_graminearum) Reduced_virulence            |
| EVM0000556 | PHI:881 MGG_04556 EDJ96020 318829 Magnaporthe_oryzae Reduced_virulence                                      |
| EVM0007007 | PHI:871 MGG_12656 EDK01997 318829 Magnaporthe_oryzae Reduced_virulence                                      |
| EVM0001764 | PHI:2533 FKS1 Q4WLT4 746128 Aspergillus_fumigatus Lethal                                                    |

|            |                                                                                                           |
|------------|-----------------------------------------------------------------------------------------------------------|
| EVM0006956 | PHI:373 PLD1 EAK93902 5476 Candida_albicans Reduced_virulence                                             |
| EVM0004888 | PHI:2349 VE1_(VEA)_(velvet) G8CYZ6 5518 Gibberella_zeae_(related:_Fusarium_graminearum) Reduced_virulence |
| EVM0005411 | PHI:881 MGG_04556 EDJ96020 318829 Magnaporthe_oryzae Reduced_virulence                                    |
| EVM0000067 | PHI:881 MGG_04556 EDJ96020 318829 Magnaporthe_oryzae Reduced_virulence                                    |
| EVM0004407 | PHI:2519 LYS9 Q4WQ27 746128 Aspergillus_fumigatus Lethal                                                  |
| EVM0005673 | PHI:1071 Gas1 CAF05793 5270 Ustilago_maydis Loss_of_pathogenicity                                         |
| EVM0008273 | PHI:1541 GzFlbD I1RE42 5518 Gibberella_zeae_(related:_Fusarium_graminearum) Unaffected_pathogenicity      |
| EVM0009965 | PHI:871 MGG_12656 EDK01997 318829 Magnaporthe_oryzae Reduced_virulence                                    |
| EVM0000925 | PHI:96 FAS2 AAA34345 5476 Candida_albicans Loss_of_pathogenicity                                          |
| EVM0003286 | PHI:2544 PAB1 Q4WK03 746128 Aspergillus_fumigatus Mixed_outcome                                           |
| EVM0004950 | PHI:2038 Mir1 MGG_02370 148305 Magnaporthe_oryzae_(related:_Magnaporthe_grisea) Unaffected_pathogenicity  |
| EVM0009621 | PHI:601 orf48 AAL20303 216597 Salmonella_enterica Unaffected_pathogenicity                                |
| EVM0001674 | PHI:96 FAS2 AAA34345 5476 Candida_albicans Loss_of_pathogenicity                                          |
| EVM0007332 | PHI:2601 Oligopeptidase_B Q94795 5693 Trypanosoma_cruzi Reduced_virulence                                 |
| EVM0001689 | PHI:1506 GzHOME001 I1RC01 5518 Gibberella_zeae_(related:_Fusarium_graminearum) Unaffected_pathogenicity   |
| EVM0005693 | PHI:274 USX1 AAM22494 5207 Cryptococcus_neoformans Loss_of_pathogenicity                                  |
| EVM0001653 | PHI:2222 Sho1 XP_759303 5270 Ustilago_maydis Mixed_outcome                                                |
| EVM0007042 | PHI:748 um00446 Not_available 5270 Ustilago_maydis Unaffected_pathogenicity                               |
| EVM0002020 | PHI:2644 thioredoxin_1 P0AA28 90371 Salmonella_enterica_serovar_Typhimurium Reduced_virulence             |
| EVM0001805 | PHI:2117 SPM1 P58371 148305 Magnaporthe_oryzae_(related:_Magnaporthe_grisea) Reduced_virulence            |
| EVM0002806 | PHI:1295 FgStuA I1S0A8 5518 Gibberella_zeae_(related:_Fusarium_graminearum) Reduced_virulence             |
| EVM0006840 | PHI:2490 MCA E9B636 5665 Leishmania_mexicana Mixed_outcome                                                |
| EVM0010219 | FgERG3A PHI:3035 I1RFM2 5518 Fusarium_graminearum reduced_virulence_                                      |
| EVM0003076 | PHI:2976 CgOPT1 C6ZRH8 29905 Colletotrichum_gloeosporioides_f._s.p._aeschynomenes Reduced_virulence       |
| EVM0005568 | PHI:2008 HST1 EDJ98541 148305 Magnaporthe_oryzae_(related:_Magnaporthe_grisea) Unaffected_pathogenicity   |

|            |                                                                                                          |
|------------|----------------------------------------------------------------------------------------------------------|
| EVM0003561 | PHI:2109 CNB MGG_06933 148305 Magnaporthe_oryzae_(related:_Magnaporthe_grisea) Mixed_outcome             |
| EVM0001631 | PHI:871 MGG_12656 EDK01997 318829 Magnaporthe_oryzae Reduced_virulence                                   |
| EVM0007761 | PHI:2510 msdS/AfmsdC Q6PWQ1 746128 Aspergillus_fumigatus Unaffected_pathogenicity                        |
| EVM0000122 | Pop1 PHI:3209 A4KTQ9 312341 Ceratocystis_populicola reduced_virulence_                                   |
| EVM0003025 | PHI:2321 SidI Q4WR83 746128 Aspergillus_fumigatus Reduced_virulence                                      |
| EVM0008744 | PHI:1180 (Sc_Sat4) I1RS32 5518 Gibberella_zeae_(related:_Fusarium_graminearum) Reduced_virulence         |
| EVM0004653 | PHI:2038 Mir1 MGG_02370 148305 Magnaporthe_oryzae_(related:_Magnaporthe_grisea) Unaffected_pathogenicity |
| EVM0005770 | PHI:419 CSH1 AAP93915 5476 Candida_albicans Reduced_virulence                                            |
| EVM0009772 | PHI:652 GIP1 AAL11720 67593 Phytophthora_sojae Effector_(plant_avirulence_determinant)                   |
| EVM0010134 | PHI:2544 PAB1 Q4WK03 746128 Aspergillus_fumigatus Mixed_outcome                                          |
| EVM0001137 | PHI:96 FAS2 AAA34345 5476 Candida_albicans Loss_of_pathogenicity                                         |
| EVM0000187 | PHI:2042 ABC3 Q3Y5V5 148305 Magnaporthe_oryzae_(related:_Magnaporthe_grisea) Loss_of_pathogenicity       |
| EVM0004080 | Pop1 PHI:3209 A4KTQ9 312341 Ceratocystis_populicola reduced_virulence_                                   |
| EVM0004025 | PHI:871 MGG_12656 EDK01997 318829 Magnaporthe_oryzae Reduced_virulence                                   |
| EVM0008974 | PHI:2552 NOP4 Q4WNM3 746128 Aspergillus_fumigatus Mixed_outcome                                          |
| EVM0000205 | PHI:1742 GzZC057 I1S7H5 5518 Gibberella_zeae_(related:_Fusarium_graminearum) Unaffected_pathogenicity    |
| EVM0007726 | PHI:748 um00446 Not_available 5270 Ustilago_maydis Unaffected_pathogenicity                              |
| EVM0003315 | PHI:2038 Mir1 MGG_02370 148305 Magnaporthe_oryzae_(related:_Magnaporthe_grisea) Unaffected_pathogenicity |
| EVM0010224 | PHI:2643 CFAS A4HTK3 5671 Leishmania_infantum Reduced_virulence                                          |
| EVM0010061 | PHI:1255 FGSG_07745 I1RQ67 5518 Gibberella_zeae_(related:_Fusarium_graminearum) Unaffected_pathogenicity |
| EVM0006879 | PHI:438 BcBOT1_(related:_CND5) AAQ16576 40559 Botrytis_cinerea Reduced_virulence                         |
| EVM0008470 | PHI:2158 MoCMK1 EU_984498 148305 Magnaporthe_oryzae_(related:_Magnaporthe_grisea) Reduced_virulence      |
| EVM0000351 | PHI:871 MGG_12656 EDK01997 318829 Magnaporthe_oryzae Reduced_virulence                                   |

|            |                                                                                                                   |
|------------|-------------------------------------------------------------------------------------------------------------------|
| EVM0007277 | PHI:174 GNA1 BAA36496 5476 Candida_albicans Reduced_virulence                                                     |
| EVM0001968 | PHI:2510 msdS/AfmsdC Q6PWQ1 746128 Aspergillus_fumigatus Unaffected_pathogenicity                                 |
| EVM0000750 | Atf1 PHI:3808 IIS0C0 5518 Fusarium_graminearum_(related:_Gibberella_zeae) effector_(plant_avirulence_determinant) |
| EVM0000062 | PHI:2930 ctf2 J9MFF7 59765 Fusarium_oxysporum_f._sp._Lycopersici Reduced_virulence                                |
| EVM0008877 | PHI:1255 FGSG_07745 IIRQ67 5518 Gibberella_zeae_(related:_Fusarium_graminearum) Unaffected_pathogenicity          |
| EVM0004058 | PHI:2042 ABC3 Q3Y5V5 148305 Magnaporthe_oryzae_(related:_Magnaporthe_grisea) Loss_of_pathogenicity                |
| EVM0002444 | PHI:2644 thioredoxin_1 P0AA28 90371 Salmonella_enterica_serovar_Typhimurium Reduced_virulence                     |
| EVM0004514 | PHI:33 PHR1 AAA68196 5476 Candida_albicans Reduced_virulence                                                      |

\*DEGs were significantly upregulated in both S vs. pre-S and S vs. post-S.



**Table S10 Differential expression of selected genes related to secondary metabolite biosynthesis, transport, and catabolism during conidiation.**

| Internal ID                      | FPKM* |        |        | Log2(FC) <sup>†</sup> |                 | PHI      |
|----------------------------------|-------|--------|--------|-----------------------|-----------------|----------|
|                                  | Pre-C | C      | Post-C | C vs.<br>pre-C        | C vs.<br>post-C |          |
| ABC transporter                  |       |        |        |                       |                 |          |
| EVM0003125                       | 0.00  | 3.00   | 0.00   | 6.51                  | 7.05            | PHI:2042 |
| EVM0004058                       | 5.71  | 11.80  | 5.54   | 1.08                  | 1.36            | PHI:2042 |
| EVM0000187                       | 9.02  | 20.94  | 8.40   | 1.26                  | 1.59            | PHI:2042 |
| EVM0003276                       | 0.48  | 3.21   | 0.46   | 2.74                  | 3.05            | PHI:2042 |
| EVM0003064                       | 35.03 | 189.63 | 16.33  | 2.47                  | 3.80            | PHI:267  |
| EVM0001189                       | 34.69 | 210.88 | 36.30  | 2.64                  | 2.80            | PHI:267  |
| Alcohol dehydrogenase GroES-like |       |        |        |                       |                 |          |
| EVM0001555                       | 0.21  | 2.13   | 0.03   | 3.10                  | 5.26            | PHI:881  |
| EVM0002621                       | 0.30  | 2.22   | 0.10   | 2.68                  | 4.23            | PHI:881  |
| EVM0000556                       | 0.49  | 1.78   | 0.06   | 1.80                  | 4.61            | PHI:881  |
| EVM0000067                       | 0.31  | 1.06   | 0.02   | 1.72                  | 4.86            | PHI:881  |
| EVM0005411                       | 1.27  | 4.32   | 0.44   | 1.72                  | 3.31            | PHI:881  |
| Cytochrome P450                  |       |        |        |                       |                 |          |
| EVM0003715                       | 0.08  | 3.17   | 0.42   | 4.84                  | 3.10            | PHI:2357 |
| EVM0002185                       | 0.04  | 73.62  | 4.56   | 6.53                  | 4.22            | PHI:4194 |
| EVM0006879                       | 10.31 | 22.53  | 9.59   | 1.16                  | 1.49            | PHI:438  |
| Co_147                           | 6.23  | 12.54  | 6.30   | 1.06                  | 1.26            | /        |
| EVM0009502                       | 0.02  | 3.72   | 0.33   | 6.30                  | 3.43            | PHI:438  |
| EVM0001327                       | 0.03  | 1.65   | 0.17   | 4.48                  | 3.19            | PHI:4194 |
| EVM0004394                       | 0.04  | 14.15  | 2.03   | 7.69                  | 3.01            | PHI:4194 |
| EVM0009549                       | 0.08  | 10.82  | 3.89   | 6.73                  | 1.73            | PHI:4194 |
| EVM0001554                       | 18.15 | 64.35  | 27.86  | 1.86                  | 1.48            | PHI:438  |
| Co_423                           | 0.03  | 1.76   | 0.14   | 4.97                  | 3.49            | /        |
| EVM0005592                       | 0.28  | 3.49   | 0.52   | 3.46                  | 2.88            | PHI:4194 |
| EVM0002960                       | 0.27  | 13.76  | 6.94   | 5.49                  | 1.25            | PHI:4194 |
| EVM0003421                       | 0.00  | 12.09  | 0.08   | 8.77                  | 6.96            | PHI:4194 |
| EVM0004379                       | 0.00  | 3.30   | 0.24   | 7.10                  | 3.77            | PHI:4194 |
| EVM0004814                       | 14.66 | 103.77 | 31.34  | 2.84                  | 1.98            | PHI:2534 |
| Co_207                           | 0.07  | 1.37   | 0.44   | 2.72                  | 1.49            | /        |
| Multicopper oxidase              |       |        |        |                       |                 |          |
| EVM0004492                       | 0.13  | 14.31  | 0.52   | 6.28                  | 4.77            | PHI:397  |
| EVM0008611                       | 0.34  | 1.85   | 0.68   | 2.40                  | 1.68            | PHI:397  |
| EVM0005600                       | 0.53  | 7.57   | 0.41   | 3.73                  | 4.37            | PHI:2920 |

\* The transcript level is expressed as fragments per kilobase per million mapped reads (FPKM).

<sup>†</sup> FC is the fold change (FC) of DEGs based on a FC of  $\geq 2$  and an FDR of  $< 0.01$ .



Figure S2. Characteristics of the de novo genome assembly. From the outside to the inside are as follows: I scaffolds, the different colors represent different scaffolds (the top10 scaffolds were chosen); II GC content; III gene density; IV miRNA; V tRNA.

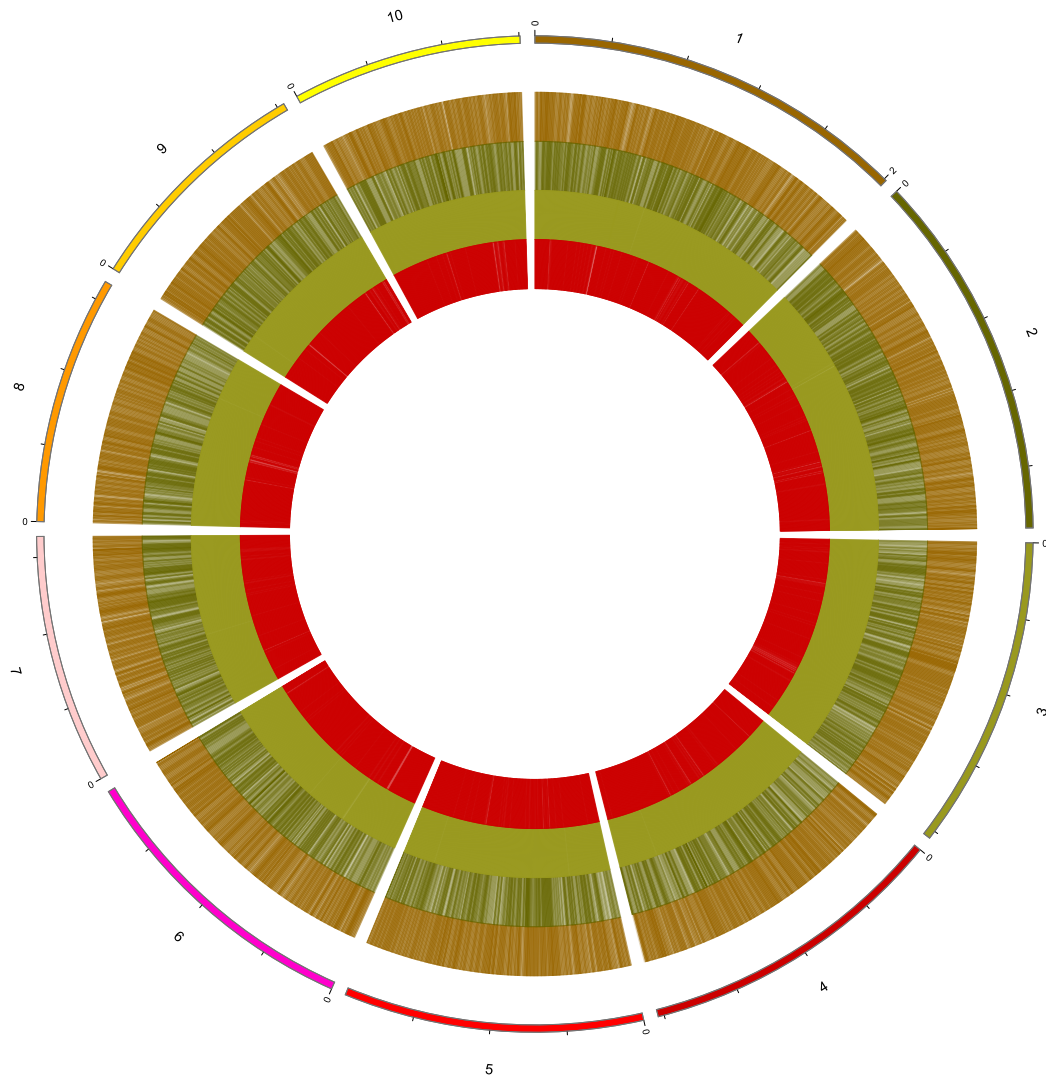

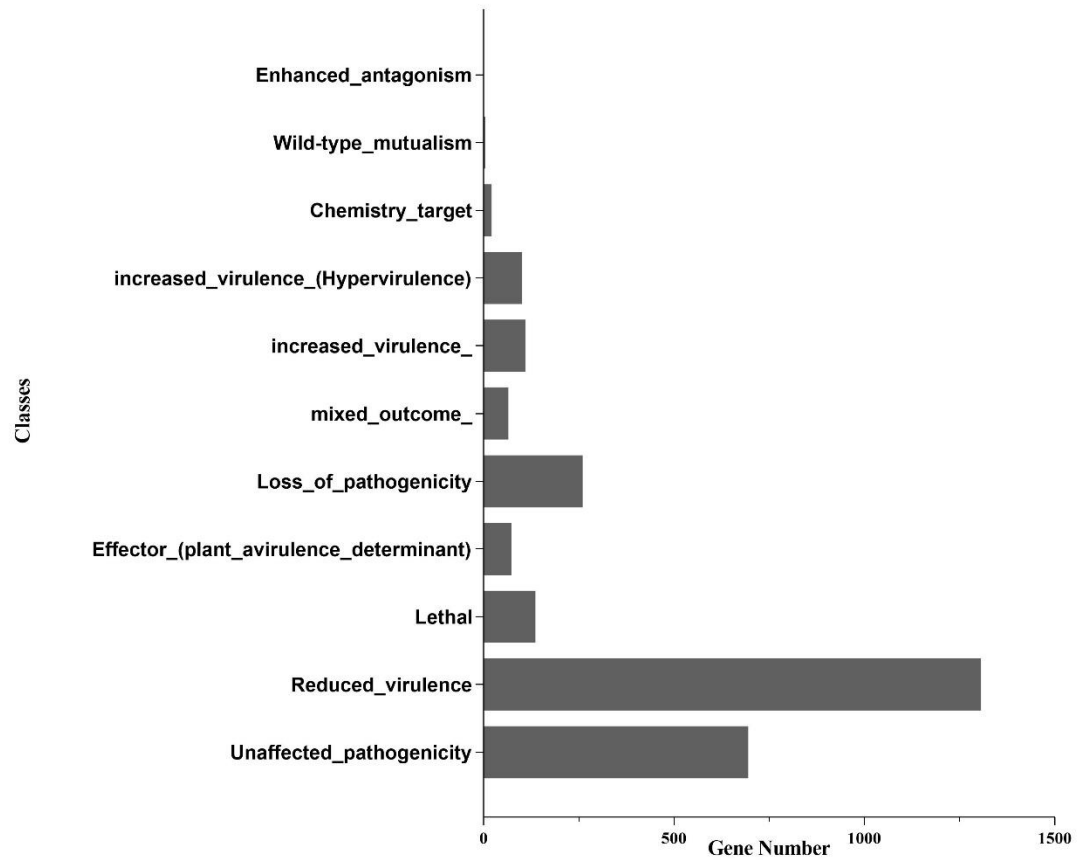

Figure S3. the PHI-annotated categories of the predicted protein-encoding genes of the *Conidiobolus obscurus* genome.

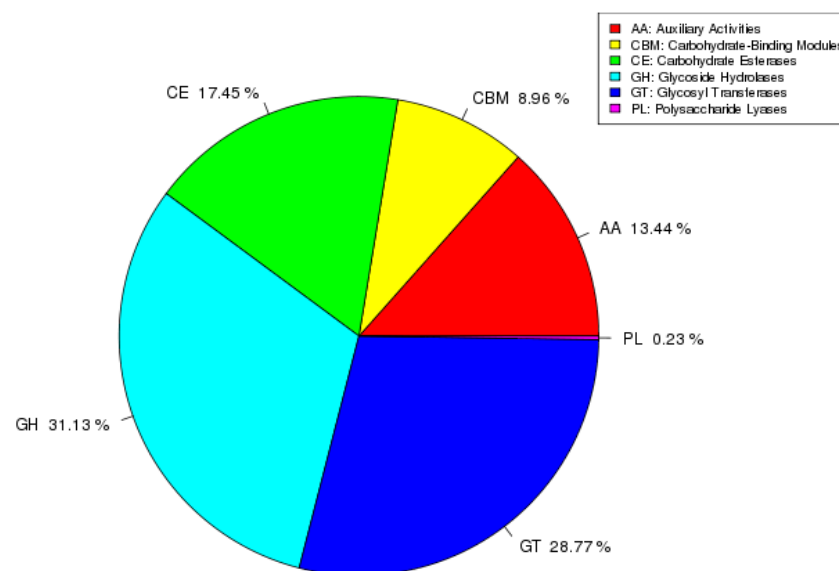

Figure S4. the CAZyme-coding genes in *Conidiobolus obscurus*.

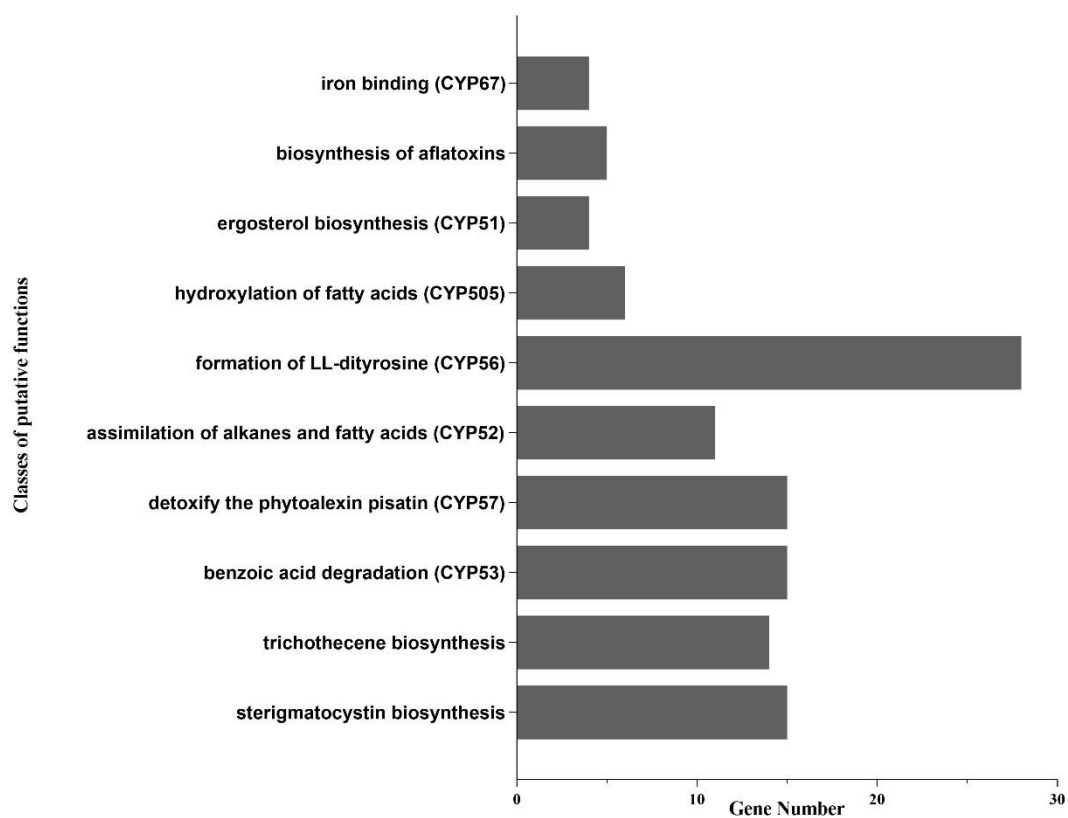

Figure S5. The putative functions and gene number of main P450 classes in the *Conidiobolus obscurus* genome.

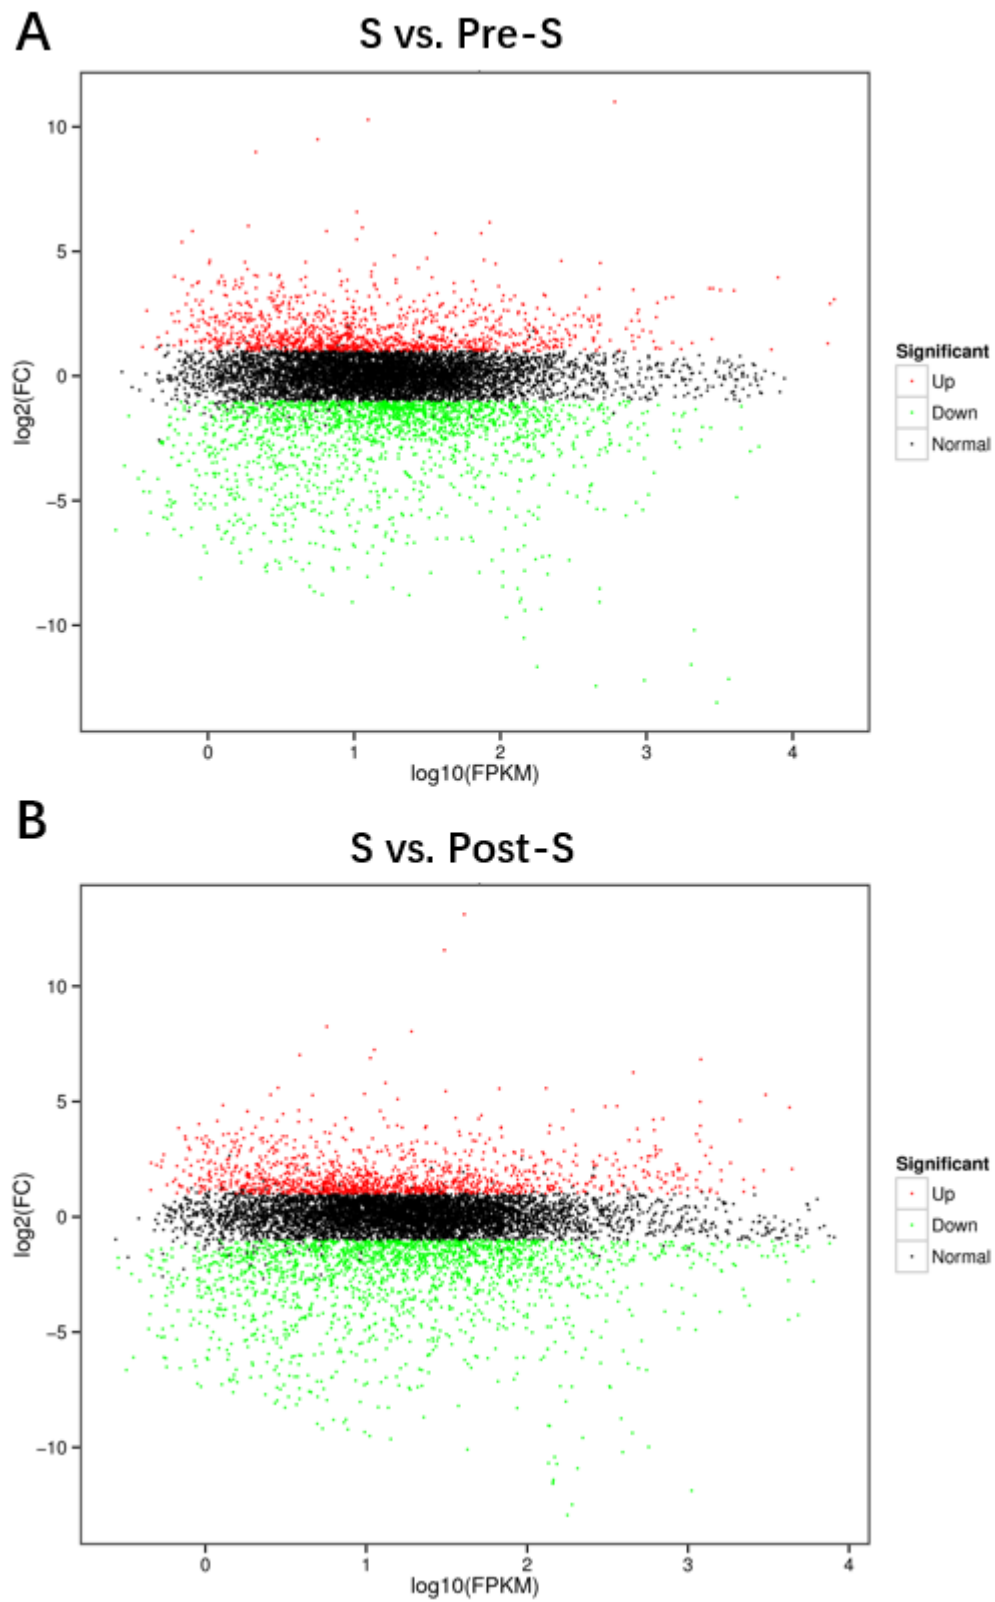

Figure S6. the MA plots of DEGs in C vs. Pre-C and C vs. Post-C.

Figure S7. Classification of upregulated genes in C stage vs. pre-C stage or C stage vs. post-C stage. (A) Number of upregulated genes putatively related to conidiation; (B) NCBI eukaryotic orthologous groups of proteins (KOG) functional annotation; (C) Gene Ontology (GO) functional annotation; (D) KEGG enrichment analysis. A smaller q value indicated a more significant enrichment, considering a  $FDR \leq 0.01$  as the threshold.

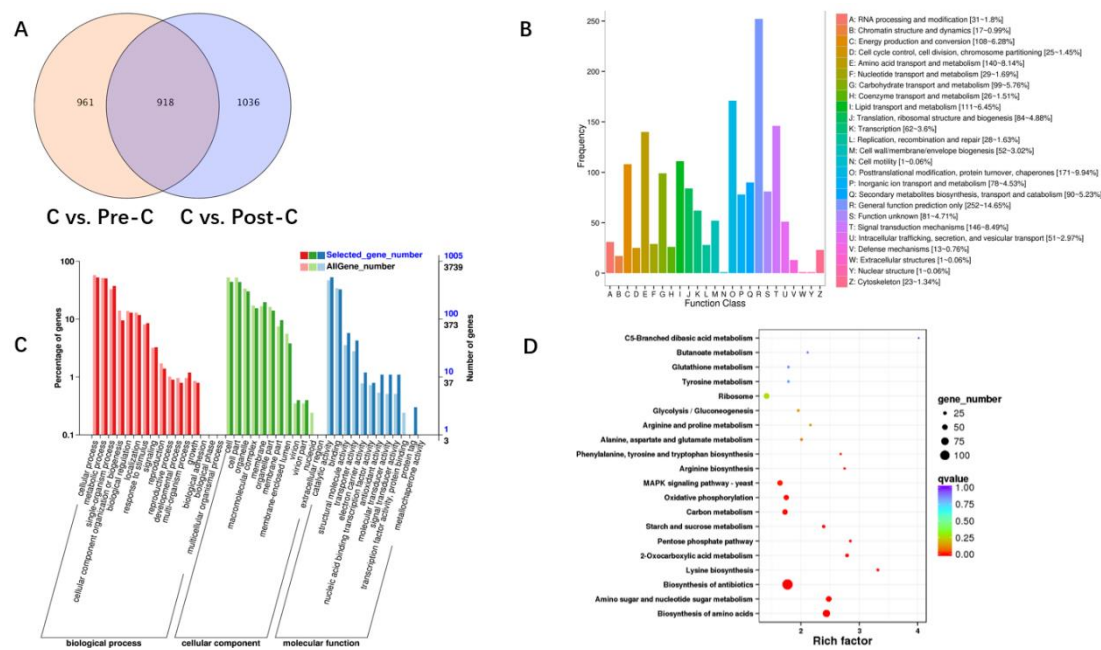



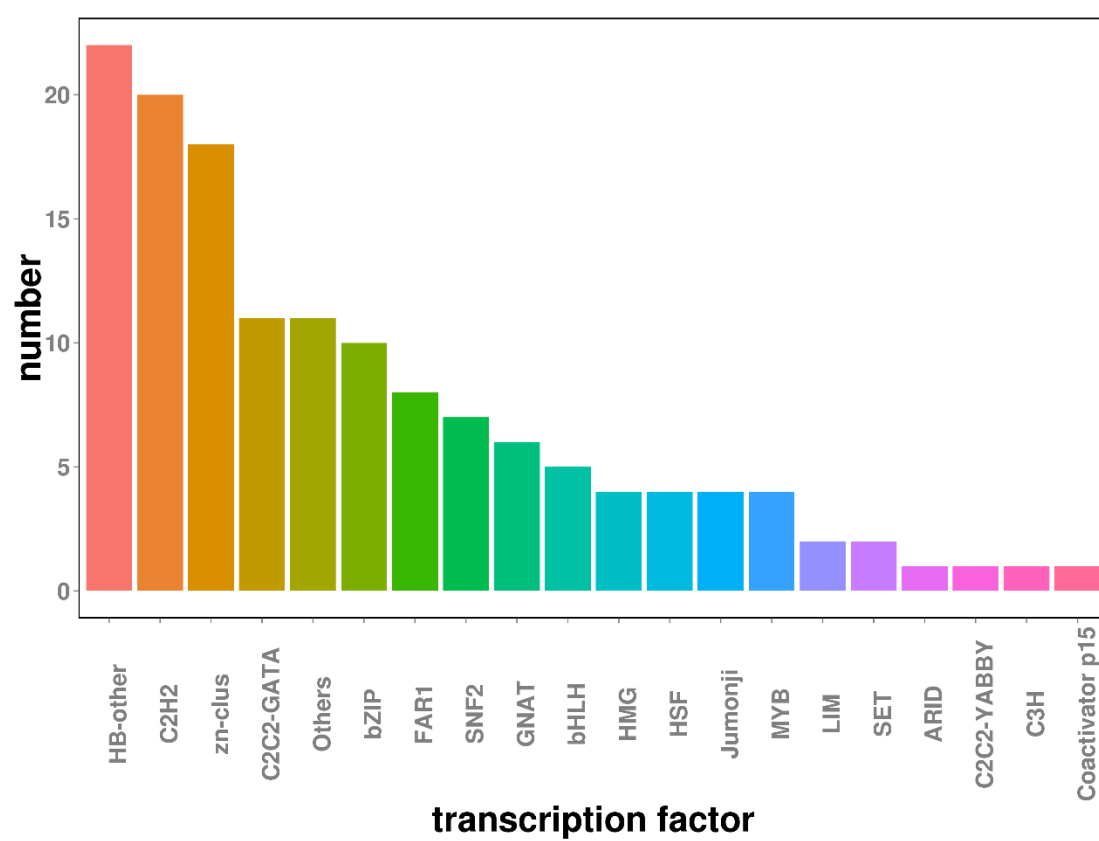

Figure S8. Transcription factor families

Figure S9. Validation of four differentially expressed transcripts at pre-C, C, and post-C stages of *C. obscurus* using RT-qPCR. (A) Heat shock transcription factor (EVM0008905); (B) Cytochrome P450 (EVM0004814); (C)  $\beta$ -glucan synthesis-associated protein (EVM0003971); (D) Trypsin-like serine proteinase (EVM0009373). Relative fold changes of C, post-C, were compared to the pre-C stage, which was set to a fold change of 1. Error bars are expressed as SEM from three biological replicates. Different lowercase letters marked on the bars indicated significant differences based on Fisher's least significant difference test following one-way ANOVA, with  $P < 0.05$ . The primers used are listed in Table S1.

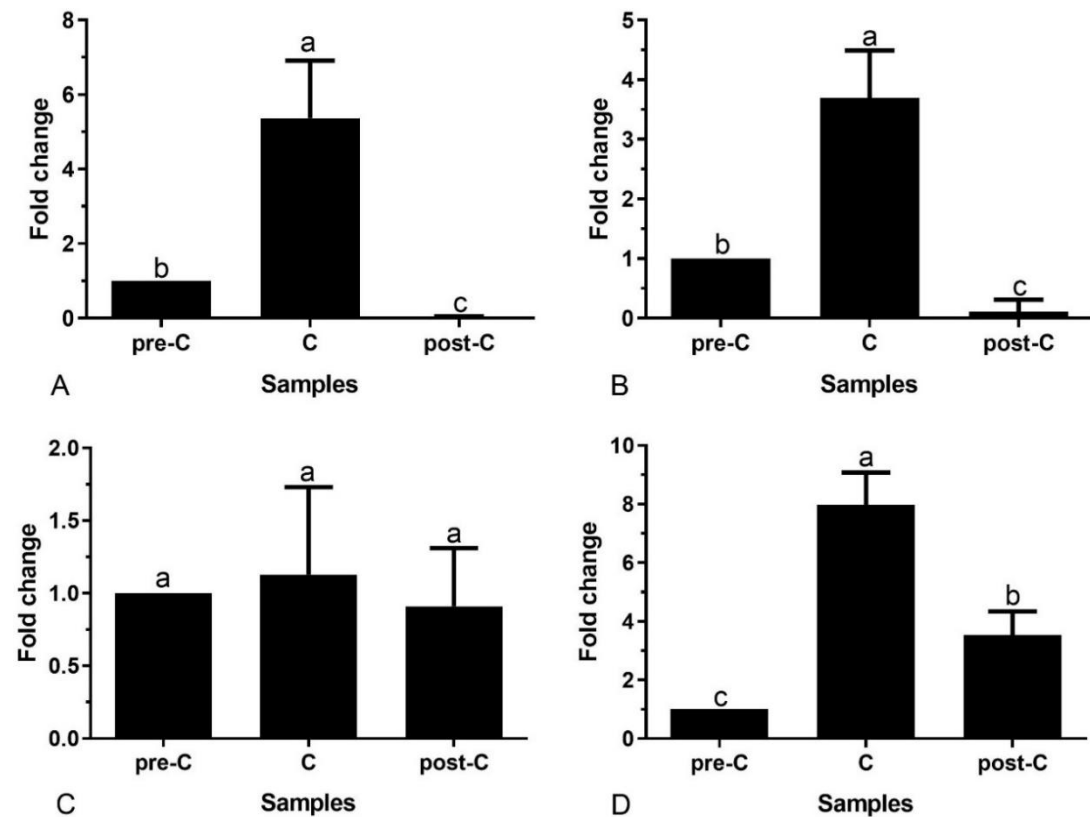

Supplement: s1 [file s1]
